# Supplementary material
Source: PubMed Central journal article supplement (PMC9715681)
Supplement: 41598_2022_24946_MOESM1_ESM.pdf [file 41598_2022_24946_MOESM1_ESM.pdf]

# Supplementary Information for “Honey bee colony loss linked to parasites, pesticides and extreme weather across the United States”

Luca Insolia<sup>1,2</sup>, Roberto Molinari<sup>3</sup>, Stephanie R. Rogers<sup>4</sup>, Geoffrey R. Williams<sup>5</sup>, Francesca Chiaromonte<sup>1,6</sup> and Martina Calovi<sup>7\*</sup>

<sup>1</sup>Institute of Economics & EMbeDS, Sant’Anna School of Advanced Studies, Pisa, 56127, Italy.

<sup>2</sup>Geneva School of Economics and Management, University of Geneva, Geneva, 1205, Switzerland.

<sup>3</sup>Department of Mathematics and Statistics, Auburn University, Auburn, 36849, AL, USA.

<sup>4</sup>Department of Geosciences, Auburn University, Auburn, 36849, AL, USA.

<sup>5</sup>Department of Entomology and Plant Pathology, Auburn University, Auburn, 36849, AL, USA.

<sup>6</sup>Department of Statistics, The Pennsylvania State University, University Park, 16802, PA, USA.

<sup>7</sup>Department of Geography, Norwegian University of Science and Technology, Trondheim, 7491, Norway.

\*Corresponding author(s). E-mail(s): [martina.calovi@ntnu.no](mailto:martina.calovi@ntnu.no);  
Contributing authors: [luca.insolia@santannapisa.it](mailto:luca.insolia@santannapisa.it);  
[robmolinari@auburn.edu](mailto:robmolinari@auburn.edu); [s.rogers@auburn.edu](mailto:s.rogers@auburn.edu);  
[grw0010@auburn.edu](mailto:grw0010@auburn.edu); [fxc11@psu.edu](mailto:fxc11@psu.edu);

## Data treatment

For our linear modeling exercise, after the data processing phase (see the *Data processing* Section of the main text), we further manipulated the data as follows. Honey bee stressor variables such as “*Varroa destructor*”, “other pests and parasites”, “diseases”, “pesticides”, and “other” were modeled taking the logit transformation of the proportion of colonies affected by these stressors (similarly to what we did for the response variable; see *Statistical model* Section of the main text). Regarding honey bee status and stressor data, uninformative predictors for honey bee colony loss were excluded from the analysis, namely: “number of initial colonies”, “percentage of lost colonies”, “percentage of renovated colonies”, “unknown”, “number of added colonies”, and “number of renovated colonies” (see Table S1). For the weather indexes that we built (see Table S2), “alpha indexes”, and “kurtosis” of weather variables and the “green-area index” (see Table S3) were log-transformed to mitigate the skewness of their distributions (see Fig. S7). The “precipitation alpha index” was not considered in our analysis due to its extremely concentrated distribution, and we divided the “norms” of weather indexes by a factor of  $10^4$  to limit their scale. Observations with any missing entry were excluded from the analysis, bringing the sample size from  $n = 880$  to  $n = 674$ . Furthermore, due to strong correlations in the collection of weather indexes that we built in our up-scaling procedure (see Fig. S8), some features were removed at the outset. Specifically, if the absolute pairwise Pearson correlation between two predictors exceeded the cut-off of 0.9, then the variable with higher mean absolute correlation (with respect to all the remaining features) was excluded from the model. This was performed through the `findCorrelation()` function of the `caret` R package (Kuhn, 2009). The predictors excluded in this way include: “minimum temperature mean”, “maximum temperature entropy”, “maximum temperature alpha index”, “precipitation mean”, and “precipitation kurtosis”. See Table S4 for a description of the predictors used in the linear modeling exercise described in the main text.

## Robust feature selection parameter tuning

We used mixed-integer programming (MIP) techniques for simultaneous feature selection and outlier detection developed by our group (Insolia et al., 2021) to obtain the regression results presented in Table 1 of the main text (see also the *Statistical model* Section of the main text). Operationally, one has to estimate a suitable level of trimming  $k_n$ , which represents the number of points not affecting the fit, as well as a sparsity parameter  $k_p$ , controlling the number of estimated regression coefficients which are non-zero. We explored several combinations of  $k_n$  and  $k_p$  values; in the following we present the results for  $k_n/n$  ranging from 0 to 15% (with a step size of 5%), and  $k_p$  ranging from 1 to 30 (with a step size of 1 and counting each dummy variable separately although we use group constraints). For each combination of  $k_n$  and  $k_p$  values, we let the MIP algorithm run for 5,000 seconds or stop at a 1% optimality gap.

To measure the overall goodness of fit, we computed the robust information criterion discussed in [Insolia et al. \(2021\)](#) with an additional correction factor based on the truncated normal as in [Riani et al. \(2022\)](#). Figure S16 shows the *robust Akaike information criterion* (rAIC) path across different trimming levels, where we report  $k_n/n$  on the  $x$ -axis. For each trimming level, we estimate the best model of size  $1 \leq \hat{k}_p \leq 30$ , and then select the one with minimum rAIC. Here, we see that lower levels of trimming favor sparser solutions, which is likely due to the effects of outlying cases, and that there is little difference in terms of minimum rAIC for trimming levels equal to 5% or 10%. For this reason, instead of picking the solution associated with the overall minimum rAIC, we also compared predictive performance to guide our choice for the trimming level. Specifically, we randomly split the data and used 80% of the observations as a training set and the remaining 20% as a testing set. For each combination of  $k_n$  and  $k_p$  values, this procedure was repeated 8 independent times, and we computed the *trimmed root mean square prediction error* (TRMSPE) on testing data across models selected by rAIC (with upper trimming equal to the trimming level in use). The left panel of Figure S17 compares the medians plus/minus median absolute deviations (MAD) of the TRMSPE across the 8 random splits for MIP against the ones obtained by the sparseLTS ([Alfons et al., 2013](#)) – the latter is an heuristic algorithm for robust feature selection and is computed through the `sparseLTS()` function of the `robustHD` R package ([Alfons, 2021](#)). The TRMSPE is typically non-increasing, and our MIP procedure outperforms sparseLTS as the trimming level reaches 10%. Moreover, the TRMSPE for MIP has a much smaller variability (which is measured by the MAD) as the contamination level reaches 10%, indicating that this solution is more stable than others. We also took the sparsity of the MIP and sparseLTS solutions into account when comparing predictive performance. The right panel of Figure S17 compares medians and MADs of the selected models of size  $\hat{k}_p$ , for each trimming level, across the 8 random splits. For a 10% trimming, MIP not only performs better than sparseLTS in terms of predictive power, but also provides sparser and thus more interpretable solutions (lower median and narrower MAD). Here the median sparsity level for MIP is close to the one that we have found on the full data set (see Figure S16), and it is much more stable than the solutions with a 5% trimming – whose MAD is approximately twice as large.

In light of all these findings, we chose to present the results for a 10% trimming, and we verified that different trimming levels (say, from 5 up to 15%) provide results which are consistent with the ones discussed in the main text. Furthermore, Figure S18 contains several regression diagnostics supporting the fact that the model selected by rAIC with a 10% trimming satisfies the underlying assumptions (for the set of non-outlying cases), and highlights the presence of outlying cases which deserve further investigation (e.g., the presence of some residuals which are 6 standard deviations away from the robust fit). Figure S20 and Table S6 provide further analyses on the outlying cases detected by our MIP.

Computations for this research were performed on the Roar supercomputer of the Institute for Computational and Data Sciences at the Pennsylvania State University. The content of the research is solely the responsibility of the authors and does not necessarily represent the views of the Institute for Computational and Data Sciences. We used basic memory option on the ACI-B cluster with an Intel Xeon 24 core processor at 2.2 GHz and 128 GB of RAM. The multi-thread option in R and Gurobi was limited to a maximum of 24 threads.



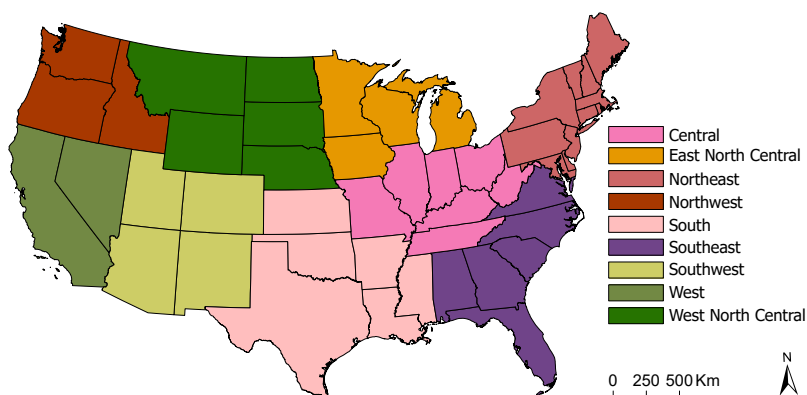

**Fig. S1:** Contiguous United States climatic regions identified by the National Climate Data Center (Karl and Koss, 1984). They are aggregated as follows. *West region:* California and Nevada; *Northwest region:* Washington, Oregon and Idaho; *Southwest region:* Utah, Colorado, Arizona and New Mexico; *West North Central region:* Montana, Wyoming, North and South Dakota, and Nebraska; *South region:* Kansas, Oklahoma, Texas, Arkansas, Louisiana and Mississippi; *Southeast region:* Alabama, Florida, Georgia, North and South Carolina, and Virginia; *Central regional:* Missouri, Illinois, Indiana, Kentucky, Tennessee, Ohio and West Virginia; *East North Central region:* Iowa, Minnesota, Wisconsin and Michigan; *Northeast region:* Pennsylvania, Washington D.C., Maryland, Delaware, New Jersey, Connecticut, Rhode Island, Massachusetts, New Hampshire, Vermont and Maine. The map has been generated by the authors in ArcGIS Pro 2.8.3 Redlands (2021).

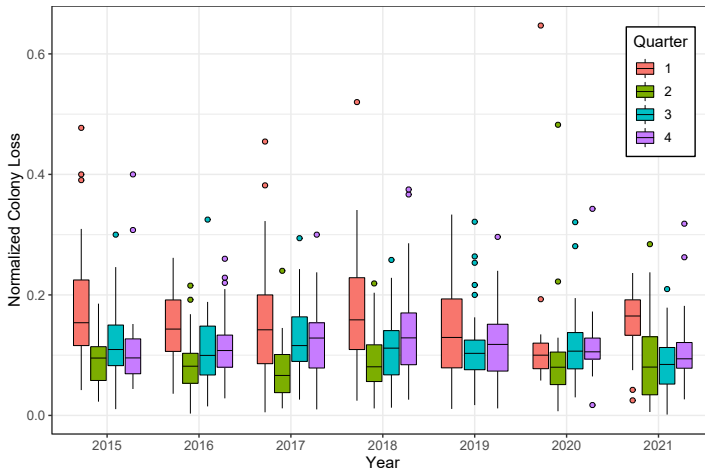

**Fig. S2:** Box plots of normalized colony loss (number of lost colonies over the maximum number of colonies) for each quarter between 2015 and 2021 across the United States; the second quarter of 2019 was not reported by the United States Department of Agriculture. The figure highlights a stable pattern across the years, showing that the first quarter typically accounts for a sensibly higher proportion of losses and has a larger variability. The second quarter of each year (which is missing for 2019) generally accounts for lowest levels of losses and reports a lower variability compared to other quarters. Losses tend to increase again during the third and fourth quarters. Only in 2015 median losses across the third quarter are higher than the ones during the fourth quarter, but they have larger variability.

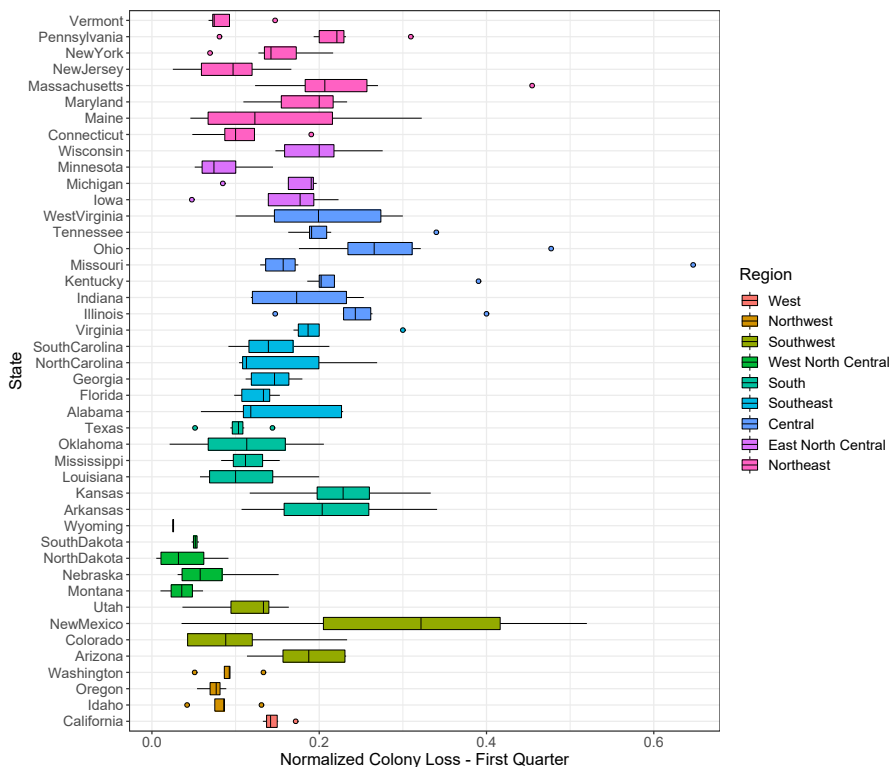

**Fig. S3:** Box plots of the normalized colony loss (number of lost colonies over the maximum number of colonies) in the first quarter of the years 2015-2021 for different states of the United States aggregated according to climatic regions. It is possible to distinguish a pattern, where states belonging to the same climatic region tend to behave quite similarly. The West North Central and Northwest regions report sensibly lower losses (whose medians are smaller than 10%) characterized by a much smaller variability. On the other hand, many states in the Central region, as well as New Mexico (which has the highest median and variability), Arkansas, Kansas, Pennsylvania, Massachusetts, Ohio and Illinois, report a median loss which is higher than 20%.

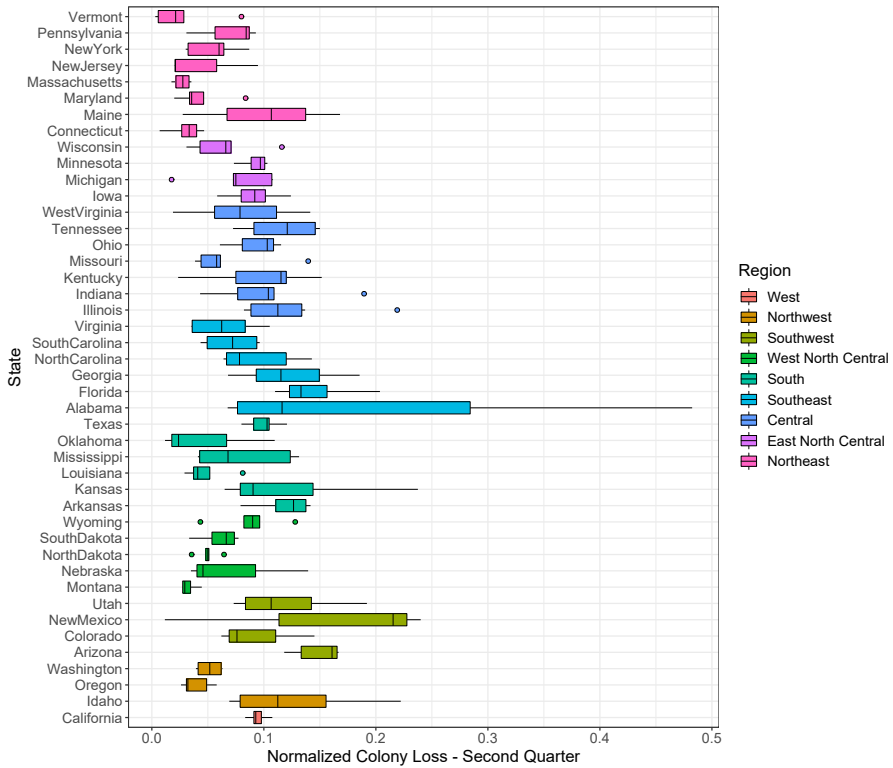

**Fig. S4:** Box plots of the normalized colony loss (number of lost colonies over the maximum number of colonies) in the second quarter of the years 2015-2021 (2019 data were not reported by the United States Department of Agriculture) for different states of the United States aggregated according to climatic regions. The findings are similar to the ones discussed in Fig. S3, although colony loss is generally lower and the differences are less marked. Alabama reports high extreme losses, whose highest level is achieved during 2020 and is also associated to the largest number of added and renovated colonies (results not shown).

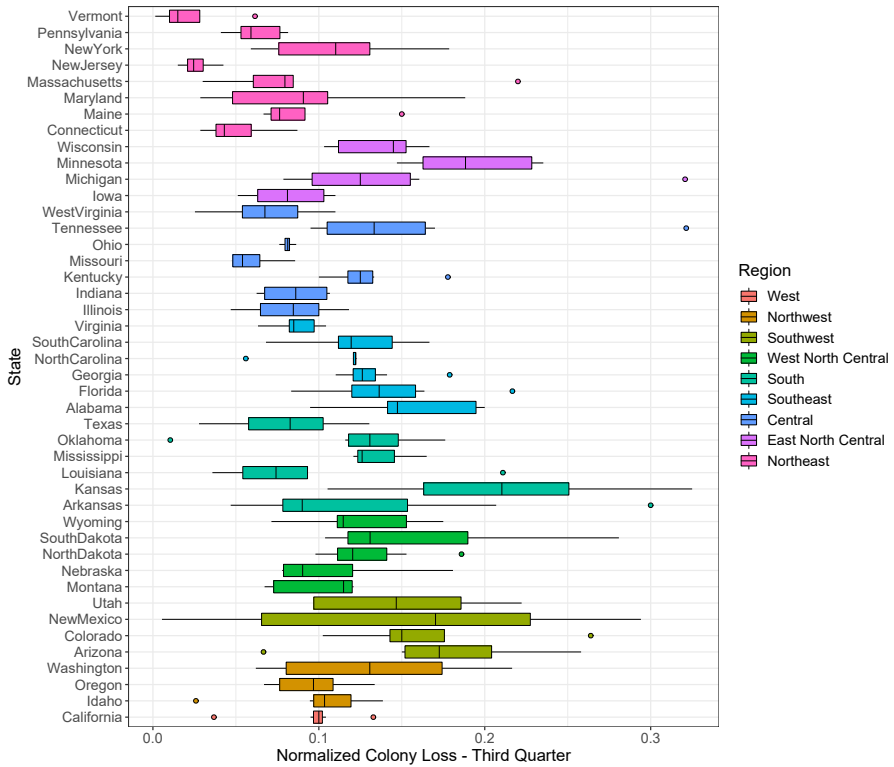

**Fig. S5:** Box plots of the normalized colony loss (number of lost colonies over the maximum number of colonies) in the third quarter of the years 2015-2021 for different states of the United States aggregated according to climatic regions. Similar findings to the ones discussed in Fig. S3 hold also here, although less markedly. West North Central and Northwest regions report higher losses compared the first quarter (whose medians are typically higher than 10%), and most states in Central region report their lowest levels of losses among all quarters.

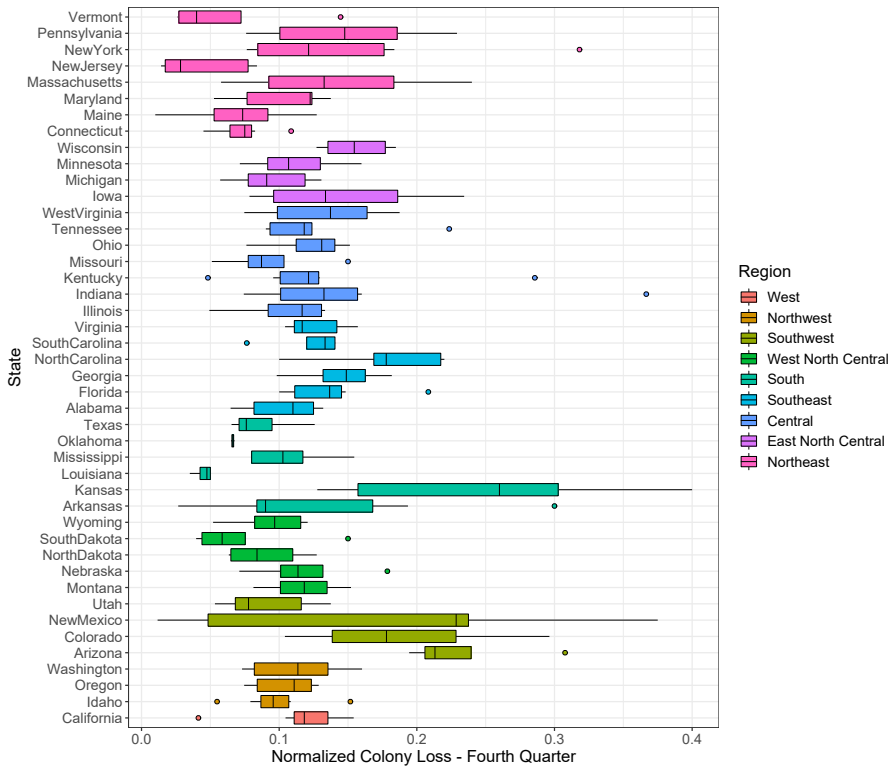

**Fig. S6:** Box plots of the normalized colony loss (number of lost colonies over the maximum number of colonies) in the fourth quarter of the years 2015-2021 for different states of the United States aggregated according to climatic regions. The findings are similar to the ones discussed in Fig. S3, although also here honey bee loss is generally lower for most states and the differences are less marked. Kansas reports high levels of losses, which are sensibly higher than other states in the South region and somehow more stable compared to the ones of New Mexico. The latter has a long left tail and reports median losses which are comparable to most states in the Southwest region.

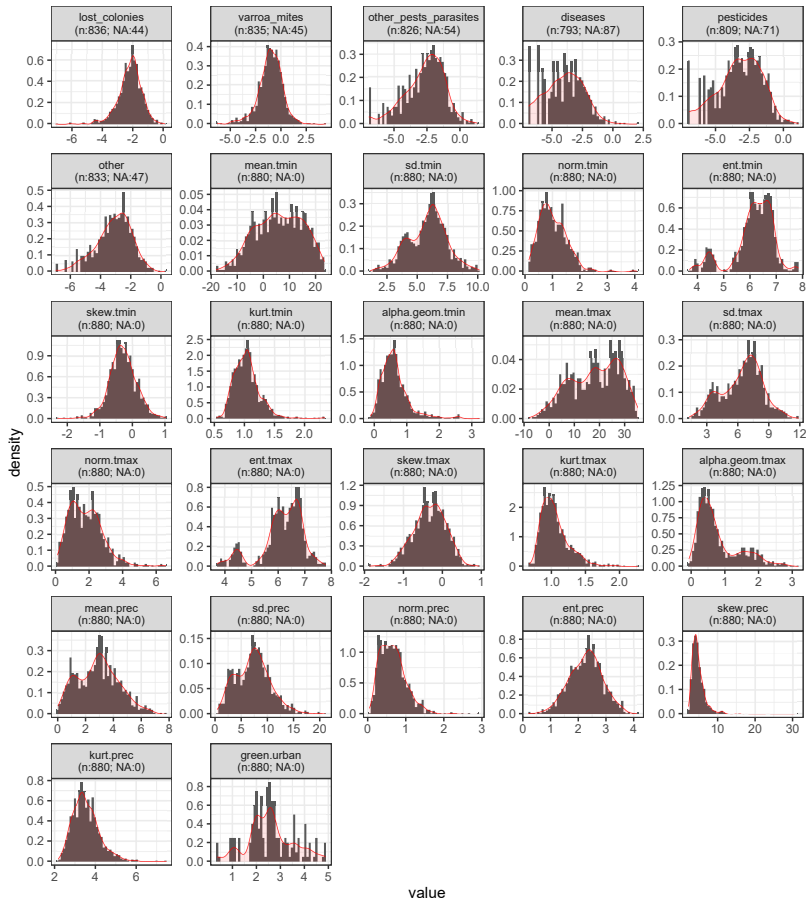

**Fig. S7:** Distribution of the response variable (lost colonies) and continuous predictors included into our linear modeling exercise for the years 2015-2019 after their transformation (before the removal of collinear predictors). Kernel density estimates are superimposed to histograms (red lines), and the number of points ( $n$ ) as well as the number of missing data (“NA”) are provided for each feature.

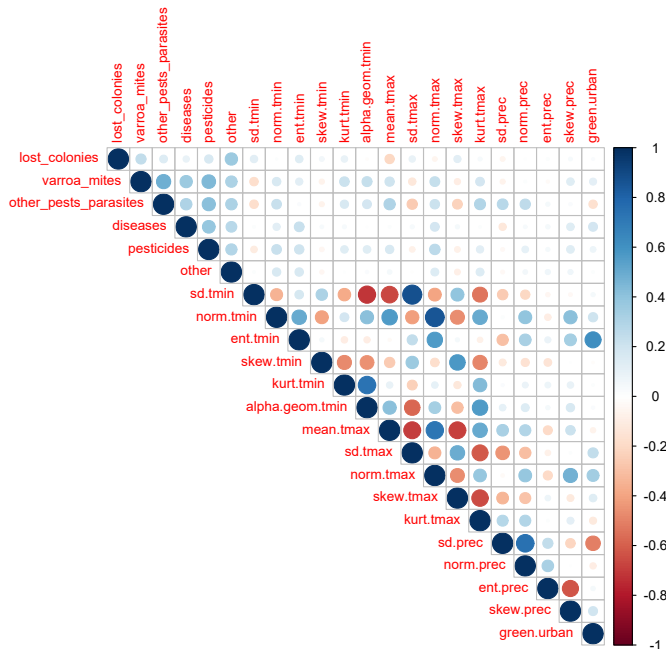

**Fig. S8:** Pearson correlations for the response variable (lost colonies) and continuous predictors considered in our linear modeling exercise for the years 2015-2019 (after the removal of predictors with Pearson correlations higher than 0.9 as described in the *Data treatment* Section of the Supplementary Information). Unlike stressor variables, which do not correlate much one with another, several weather indexes – that we created to capture more complex distributional characteristics – tend to create groups of correlated features.



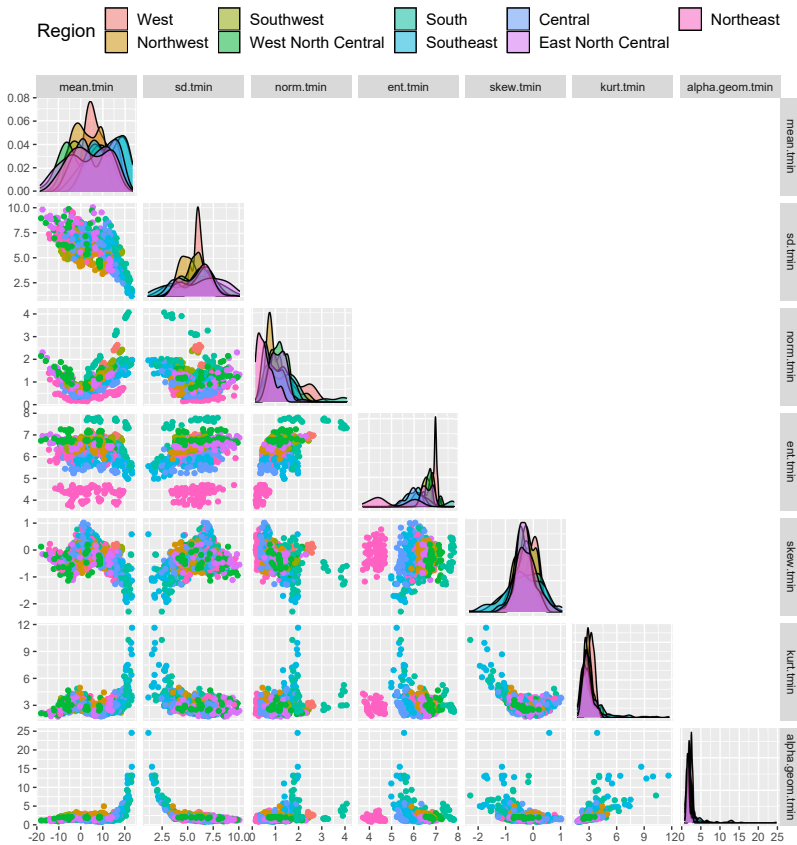

**Fig. S9:** Scatter matrix and univariate densities for weather indexes created from the distribution of minimum temperatures across the United States climatic regions. These data cover the years 2015-2021.

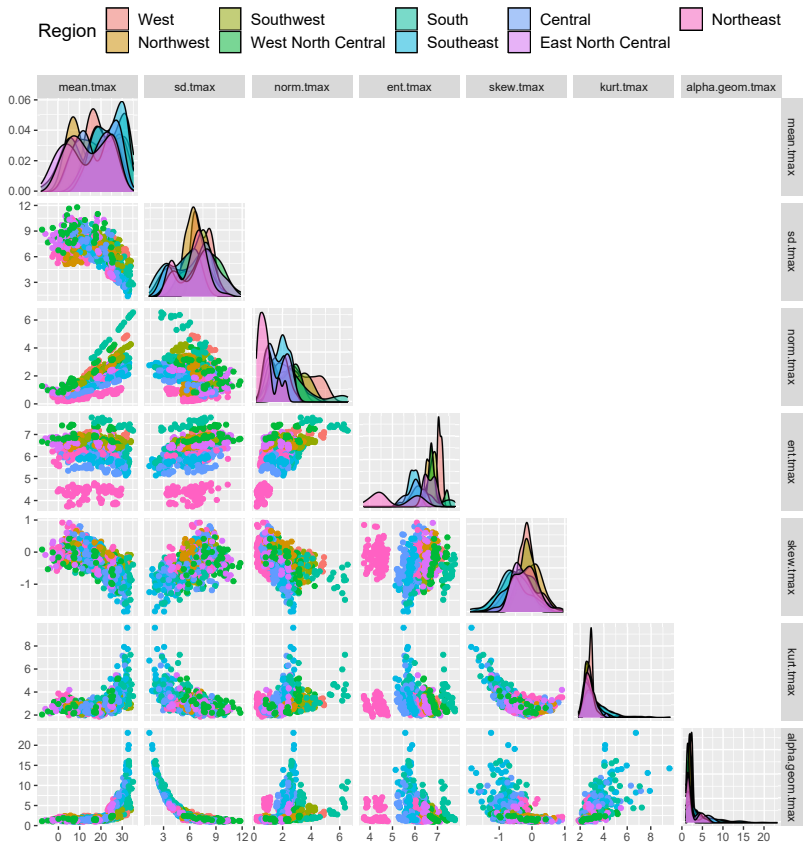

**Fig. S10:** Scatter matrix and univariate densities for weather indexes created from the distribution of maximum temperatures across the United States climatic regions. These data cover the years 2015-2021.

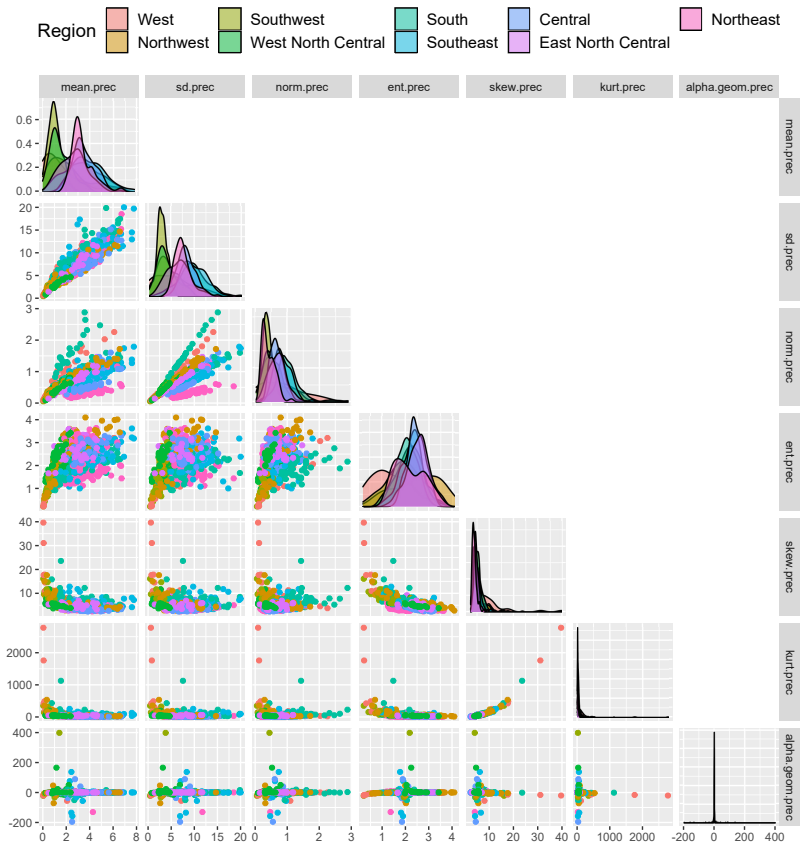

**Fig. S11:** Scatter matrix and univariate densities for weather indexes created from the distribution of precipitations across the United States climatic regions. These data cover the years 2015-2021.

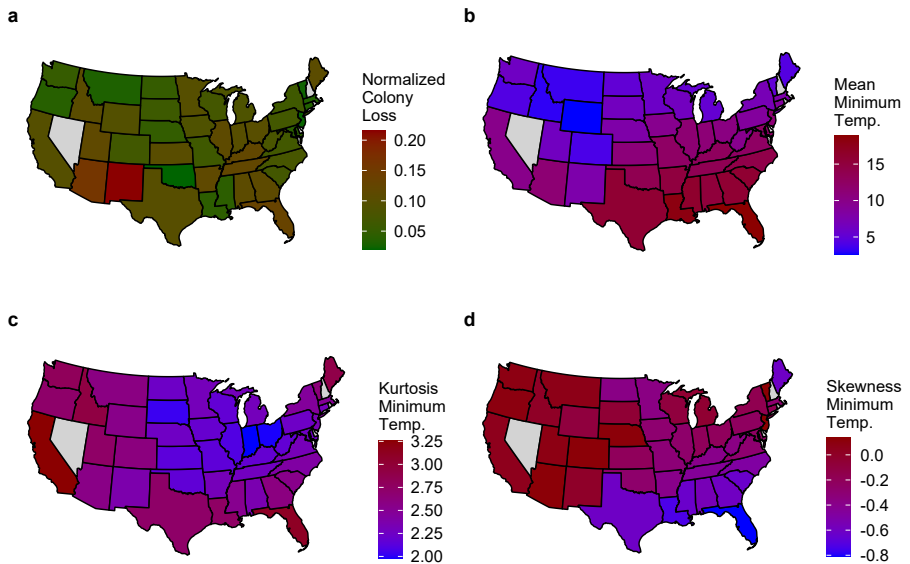

**Fig. S12:** Spatial representation of the median for second quarter data in the years 2015-2021 (2019 was not reported by the United States Department of Agriculture). (a) Normalized colony loss. (b) Mean of minimum temperatures. (c) Kurtosis of minimum temperatures. (d) Skewness of minimum temperatures. The map has been generated by the authors in R 3.6.2 [R Core Team \(2021\)](#).

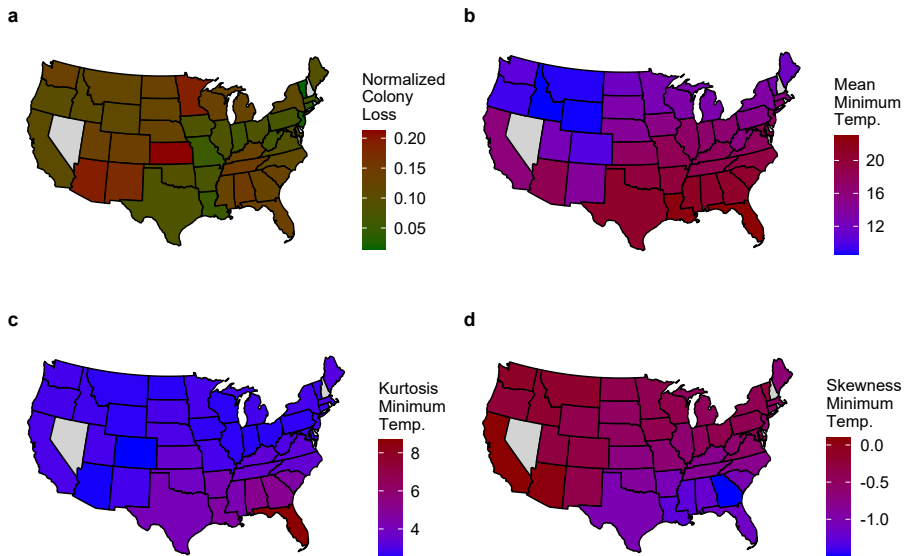

**Fig. S13:** Spatial representation of the median for third quarter data in the years 2015-2021. (a) Normalized colony loss. (b) Mean of minimum temperatures. (c) Kurtosis of minimum temperatures. (d) Skewness of minimum temperatures. The map has been generated by the authors in R 3.6.2 [R Core Team \(2021\)](#).

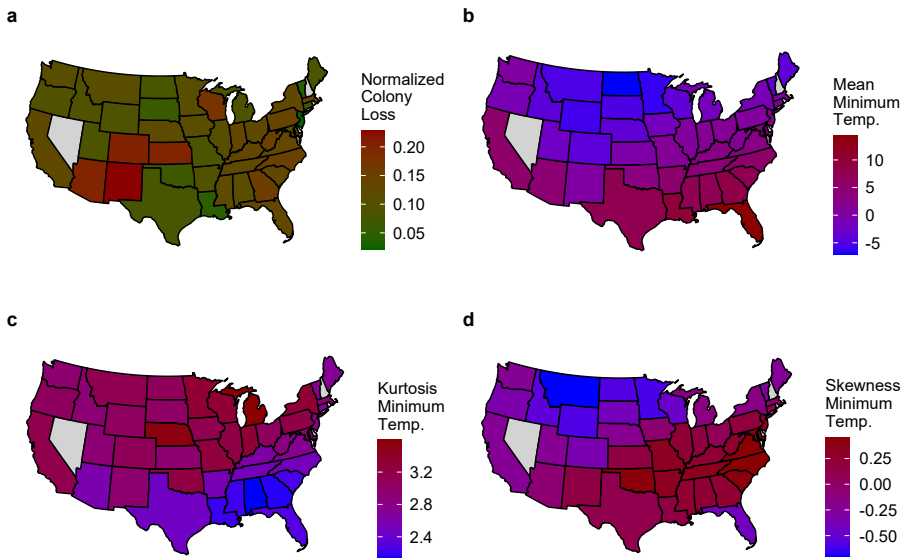

**Fig. S14:** Spatial representation of the median for fourth quarter data in the years 2015-2021. (a) Normalized colony loss. (b) Mean of minimum temperatures. (c) Kurtosis of minimum temperatures. (d) Skewness of minimum temperatures. The map has been generated by the authors in R 3.6.2 [R Core Team \(2021\)](#).

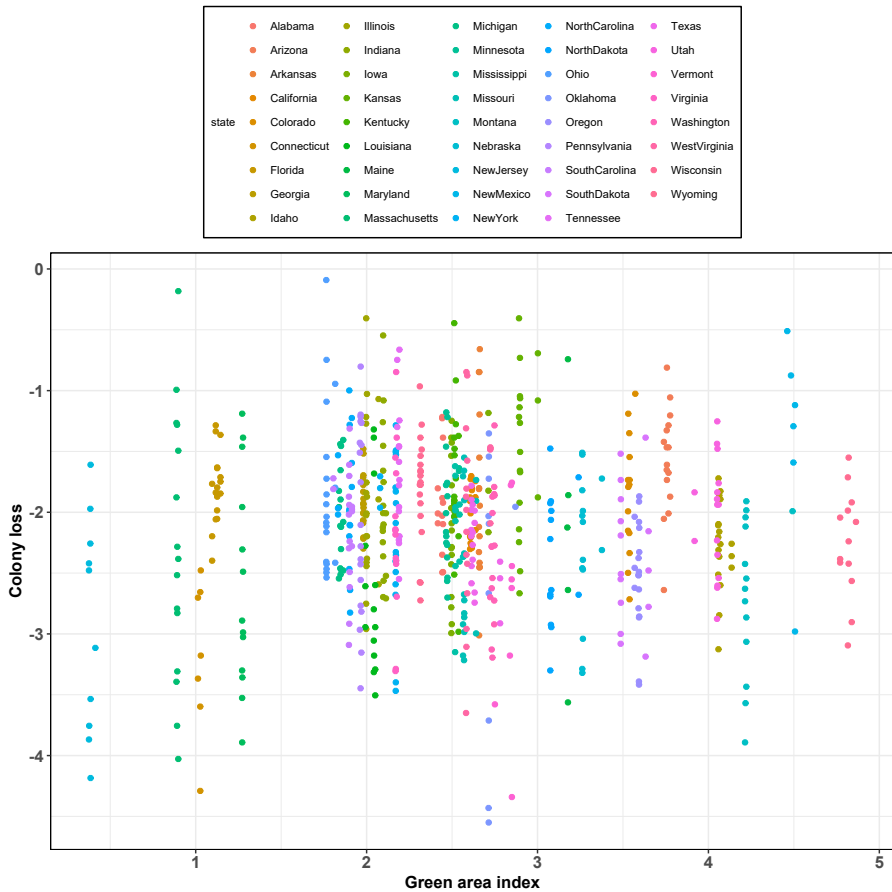

**Fig. S15:** Scatterplot of the response variable used in our linear modeling exercise against the transformed “green-area index” across each state in the United States for the years 2015-2019. Most states experience very little variability in terms of green areas across different years; hence, this feature is partially capturing state-level variability.

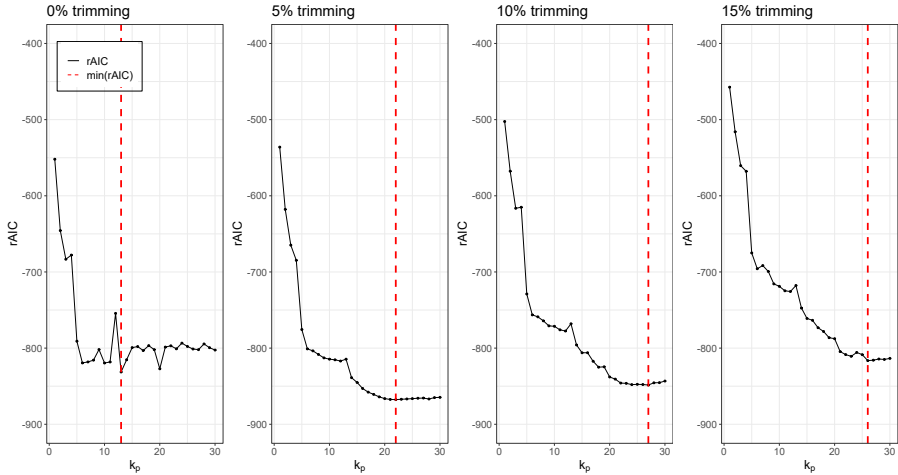

**Fig. S16:** Robust Akaike information criterion (rAIC; with minimum value indicated by a vertical dashed line) for our mixed-integer programming approach (Insolia et al., 2021) across sparsity levels and amounts of trimming. The sparsity level  $k_p$  increases from 1 to 30 with a step size of 1 (which is reported in the  $x$ -axis of each panel), and the trimming proportion  $k_n/n$  increases from 0% to 15% with a step size of 5% (from left to right). These results are based on data for the years 2015-2019.

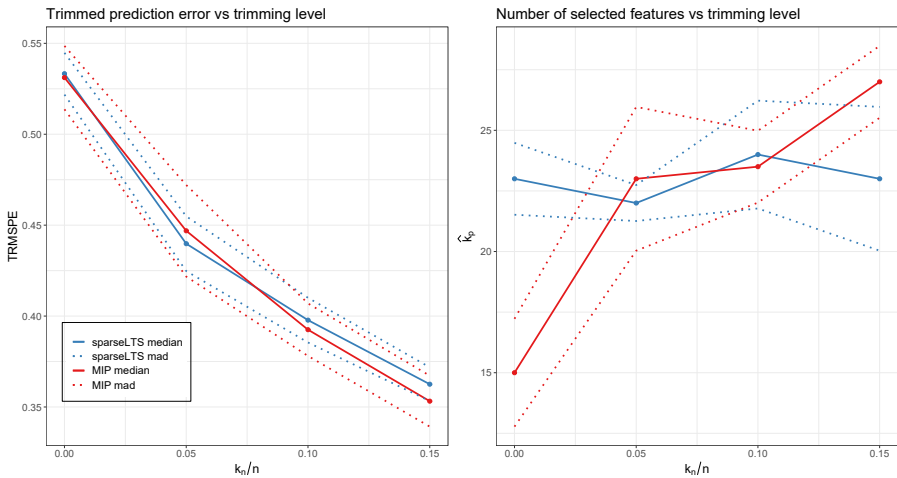

**Fig. S17:** Medians and medians  $\pm$  median absolute deviations of the trimmed root mean squared error (left panel) and number of selected features (right panel) for sparseLTS (Alfons et al., 2013) and our mixed-integer programming approach (Insolia et al., 2021). These are computed across trimming proportions  $k_n/n$  ranging from 0% to 15% (with a step size of 5%) and they are based on 8 independent training/testing splits containing 80% and 20% of the points, respectively. These results are based on data for the years 2015-2019.



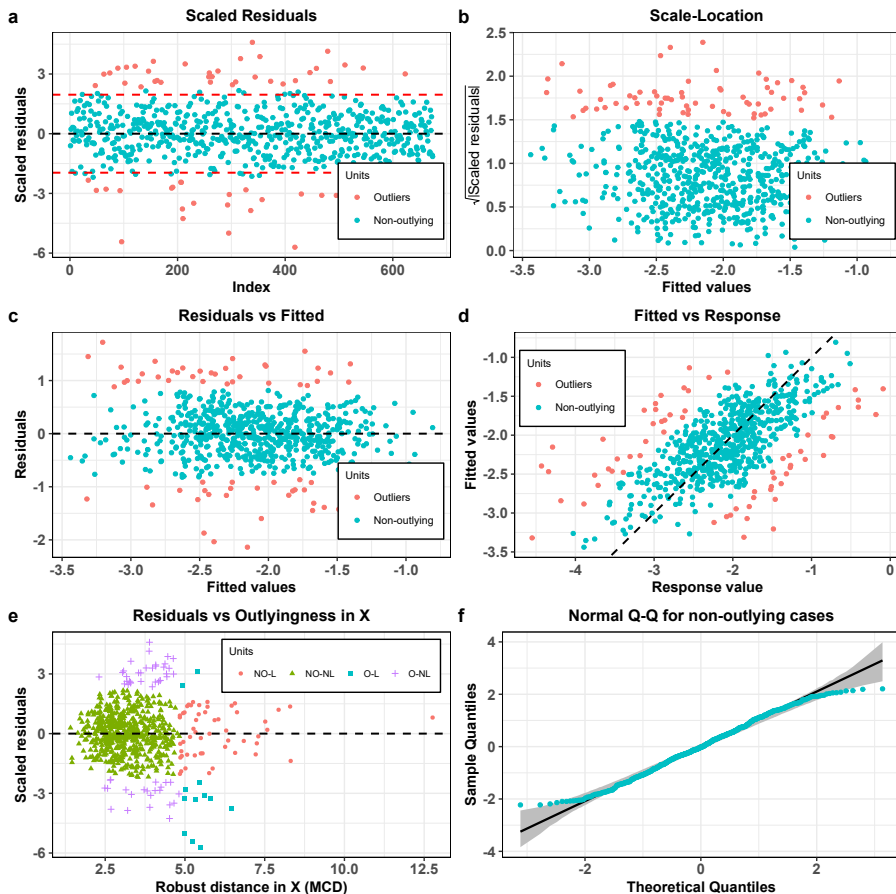

**Fig. S18:** Regression distance diagnostics for the model selected by our mixed-integer programming (MIP) approach (Insolia et al., 2021) with a 10% trimming. (a) Scaled residuals for outlying (red) and non-outlying (blue) cases. (b) Square root of absolute scaled residuals for outlying (red) and non-outlying (blue) cases. (c) Residuals for outlying (red) and non-outlying (blue) cases against fitted values (or predicted values for outlying cases). (d) Fitted values for non-outlying cases (blue) and predicted values for outlying cases (red) against the observed value of the response variable. (e) Scaled residuals against a robust measure of outlying-ness in the predictors' space. The latter is computed using the minimum covariance determinant estimator (Rousseeuw and Driessen, 1999) in the `rrcov` R package (Todorov and Filzmoser, 2009) where the trimming proportion is set to 10% as for MIP estimates and we used the 0.975 quantile of a chi-square distribution to flag leverage points (i.e., outliers in the predictors' space). Points are grouped as non-outlying cases and non-leverage points (NO-NL, green), outliers but non-leverage points (O-NL, purple), leverage points and non-outlying cases (NO-L, red), and outliers and leverage points (O-L, blue). (f) Normal QQ-plot for the scaled residuals of non-outlying cases. These results are based on data for the years 2015-2019.

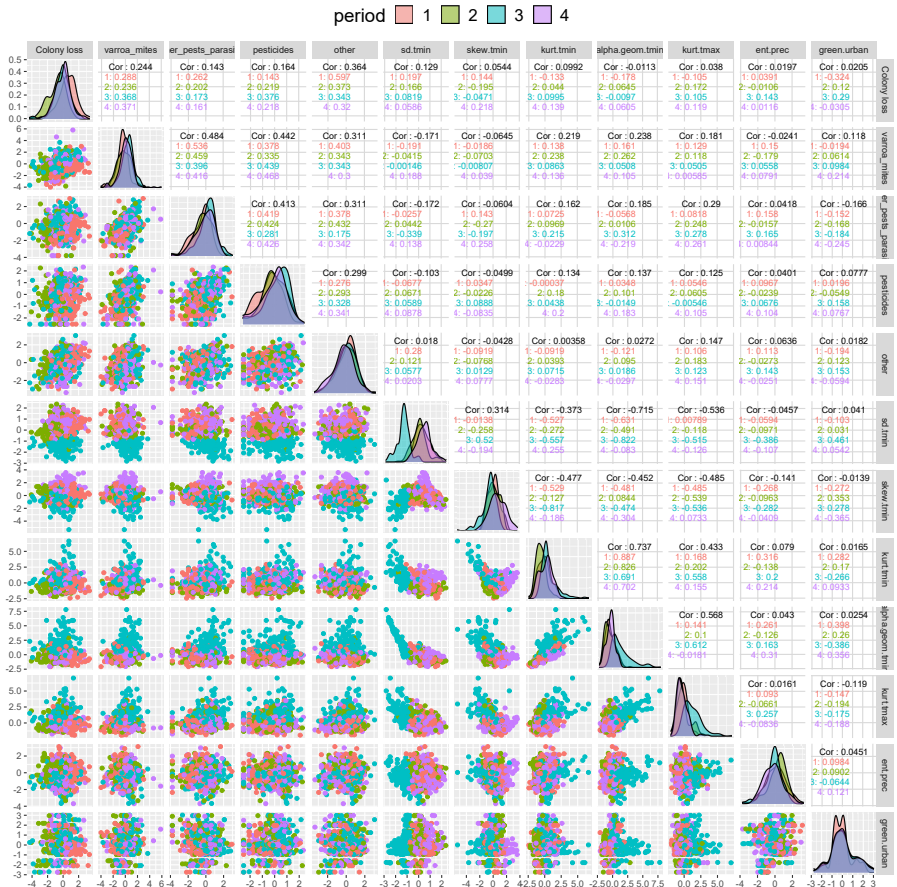

**Fig. S19:** Scatter matrix, marginal correlations and univariate densities across different quarters for the response variable and continuous predictors selected by our mixed-integer programming approach (Insolia et al., 2021) with a 10% trimming. These plots are based on data covering the years 2015-2019.

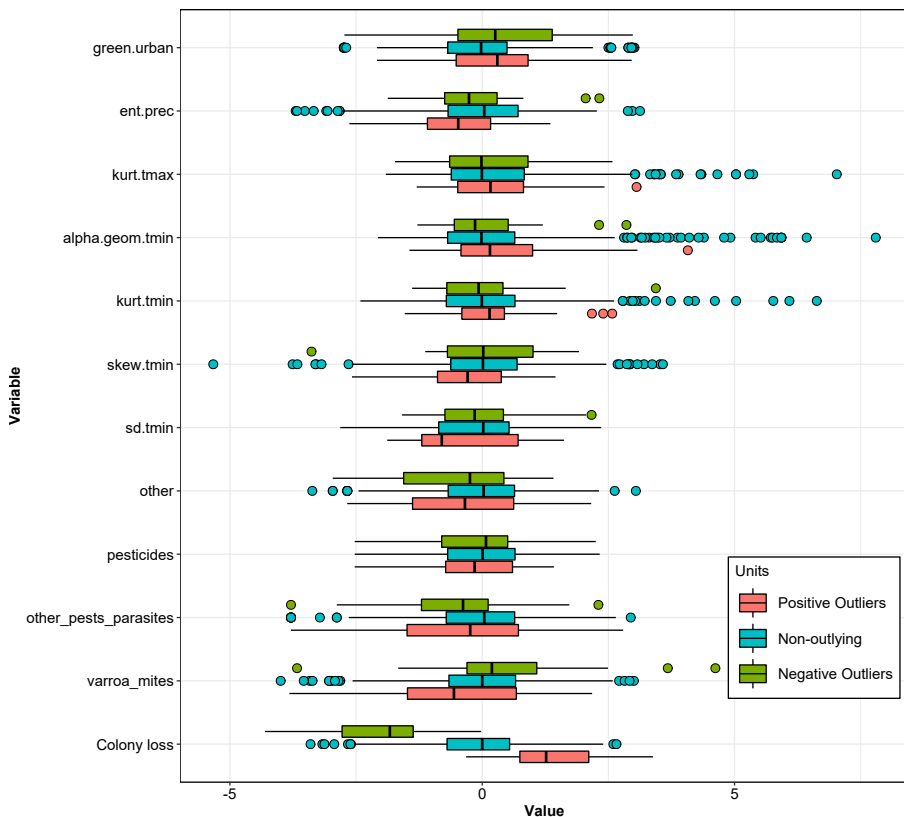

**Fig. S20:** Box plots for the response variable and continuous predictors selected by our mixed-integer programming approach (Insolia et al., 2021) with a 10% trimming, contrasting outlying and non-outlying case. Red, green and blue boxes represent points estimated as outliers with positive and negative residuals, and non-outlying cases, respectively. The values of each feature are scaled to have zero median and unit median absolute deviation. These results are based on data covering the years 2015-2019.

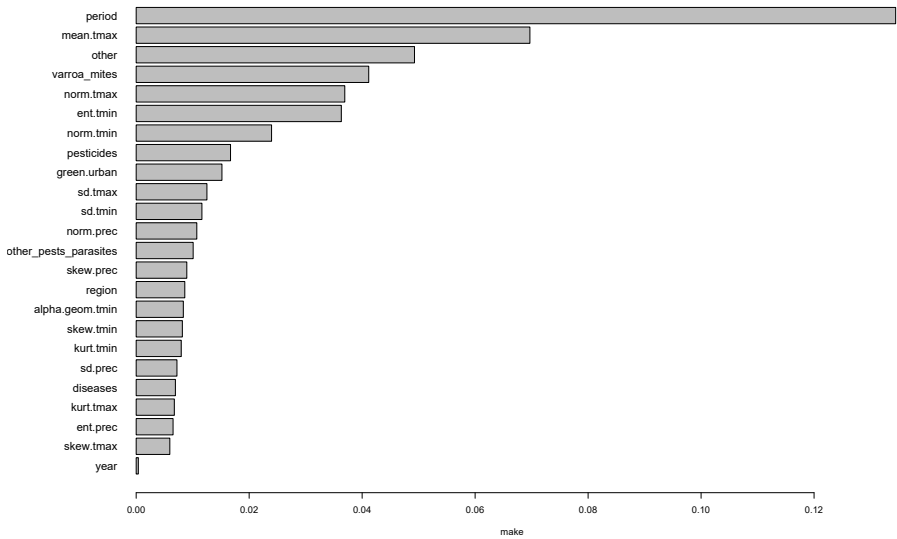

**Fig. S21:** Feature importance based on random forest (Breiman, 2001), which is computed through the `ranger` R package (Wright and Ziegler, 2017), for the same set of variables used in our linear modeling exercise. We compared an increasing number of trees (from 1000 to 5000 with a step size of 1000) and number of variables to possibly split at in each node (ranging from 5 to 15). Feature importance is based on a permutation approach (Wright et al., 2017). This result is based on data covering the years 2015-2019.

**Table S1:** Honey bee (*Apis mellifera*) colonies status and stressor data description. Adapted from the annual Honey Bee Colonies Loss Report released by the [United States Department of Agriculture, National Agricultural Statistics Service \(2022\)](#) – data downloaded from: <https://usda.library.cornell.edu/concern/publications/rn301137d?locale=en>. The data are collected by the National Agricultural Statistics Service through the Colony Loss Survey and recorded by states and quarters (January-March, April-June, July-September, October-December) for the years 2015-2021. Only operations with five or more total colonies are included in the survey, and beekeepers need to meet criteria on the definition of a farm (e.g., an agricultural product turnover higher than \$1,000 per year). Data for Nevada, New Hampshire, Rhode Island and Delaware are not reported, as well as the second quarter of 2019. The questionnaire can be found at: [https://www.nass.usda.gov/Publications/Methodology\\_and\\_Data\\_Quality/Honey\\_Bee\\_Colonies/index.php](https://www.nass.usda.gov/Publications/Methodology_and_Data_Quality/Honey_Bee_Colonies/index.php). A complete description of the methodology can be found in the Honey Bee Colonies Methodology and Quality Measures document, available at: [https://www.nass.usda.gov/Publications/Methodology\\_and\\_Data\\_Quality/Honey\\_Bee\\_Colonies/10\\_2021/hbclqm21.pdf](https://www.nass.usda.gov/Publications/Methodology_and_Data_Quality/Honey_Bee_Colonies/10_2021/hbclqm21.pdf).

| Variable                  | Type       | Description                                                                                                                                                                                                                                                |
|---------------------------|------------|------------------------------------------------------------------------------------------------------------------------------------------------------------------------------------------------------------------------------------------------------------|
| Maximum colonies          | Count      | Number of colonies on the first day of a quarter, plus all colonies that moved into that state during the quarter. Colonies that were added, lost, or renovated are not included, and colonies are counted in every state they were in during each quarter |
| Lost colonies             | Count      | Number of colonies no longer viable (e.g., completely failed colony, loss of most workers, and possibly the queen)                                                                                                                                         |
| Percent lost              | Percentage | Number of lost colonies divided by the maximum colonies                                                                                                                                                                                                    |
| Added colonies            | Count      | Number of added colonies                                                                                                                                                                                                                                   |
| Renovated colonies        | Count      | Number of surviving colonies that were requeened or received new honey bees through nuc or package                                                                                                                                                         |
| Percent renovated         | Percentage | Number of renovated colonies divided by the maximum colonies                                                                                                                                                                                               |
| <i>Varroa destructor</i>  | Percentage | Number of colonies affected by <i>Varroa destructor</i> divided by the maximum colonies                                                                                                                                                                    |
| Other pests and parasites | Percentage | Number of colonies affected by tracheal mites, nosema, hive beetle, wax moths, etc. divided by the maximum colonies                                                                                                                                        |
| Diseases                  | Percentage | Number of colonies affected by certain diseases divided by the maximum colonies. Diseases include American and European foulbrood, chalkbrood, stonebrood, paralysis (acute and chronic), kashmir, deformed wing, sacbrood, IAPV, Lake Sinai II, etc.      |
| Pesticides                | Percentage | Number of colonies affected by pesticides divided by the maximum colonies                                                                                                                                                                                  |
| Other                     | Percentage | Number of colonies affected by other events divided by the maximum colonies. These events include weather, starvation, insufficient forage, queen failure, hive damage/destroyed, etc.                                                                     |
| Unknown                   | Percentage | Number of colonies affected by unknown causes divided by the maximum colonies                                                                                                                                                                              |

**Table S2:** Weather indexes description. The weather indexes that we built are based on Parameter-elevation Regressions on Independent Slopes Model (PRISM) data (PRISM Climate Group, 2022) – raw data downloaded from <https://prism.oregonstate.edu/>. The PRISM 4-kilometer-squared gridded daily temperature and precipitation data were used to generate weather-related variables covering 2015-2021 and the whole United States (by states and quarters). For each combination of day and element of the grid, the maximum and minimum temperature were extracted, as well as total precipitation (given by the combination of rain and melted snow). See the *Data processing* Section of the main text for further details on the computation of these indexes.

| Variable                    | Description                                                   |
|-----------------------------|---------------------------------------------------------------|
| Min./Max. temp. mean        | Mean minimum and mean maximum temperature                     |
| Min./Max. temp. std. dev.   | Standard deviation of the minimum and maximum temperature     |
| Min./Max. temp. norm        | $L_2$ -norm for minimum and maximum temperature               |
| Min./Max. temp. entropy     | Entropy for minimum and maximum temperature                   |
| Min./Max. temp. skewness    | Skewness of the minimum and maximum temperature               |
| Min./Max. temp. kurtosis    | Kurtosis of the minimum and maximum temperature               |
| Min./Max. temp. alpha index | Tail exponent $\alpha$ of the minimum and maximum temperature |
| Precipitation mean          | Mean precipitation                                            |
| Precipitation std. dev.     | Standard deviation of precipitation                           |
| Precipitation norm          | $L_2$ -norm of precipitation                                  |
| Precipitation entropy       | Entropy of precipitation                                      |
| Precipitation skewness      | Skewness of precipitation                                     |
| Precipitation kurtosis      | Kurtosis of precipitation                                     |
| Precipitation alpha index   | Tail exponent $\alpha$ of precipitation                       |

**Table S3:** Land use data description. Adapted from the Cropland Data Layer (CDL) which is provided by the National Agricultural Statistics Service of the United States Department of Agriculture (Boryan et al., 2011) – data downloaded from [https://www.nass.usda.gov/Research\\_and\\_Science/Cropland/sarsfaqs2.php](https://www.nass.usda.gov/Research_and_Science/Cropland/sarsfaqs2.php). CDL data are collected annually and cover the whole United States at the resolution of a 30-meter-squared grid. They were used to generate annual land-use data for the years 2015-2021 across states of the United States. The original land-use categories were grouped in 6 major classes: “developed”, “forest”, “pasture”, “rangeland”, “crop”, and “water”. Following the approach in Naug (2009), the “water” class was excluded from our analysis.

| Variables | Group                                                                                                                                                                                                                                                                                                                                                                                                                                                                                                                                                                                                                                                                                                                                                                                                                                                                                                                                                                                                                                                                                                                                                                                                                                                                                                                                                                                                                                      |
|-----------|--------------------------------------------------------------------------------------------------------------------------------------------------------------------------------------------------------------------------------------------------------------------------------------------------------------------------------------------------------------------------------------------------------------------------------------------------------------------------------------------------------------------------------------------------------------------------------------------------------------------------------------------------------------------------------------------------------------------------------------------------------------------------------------------------------------------------------------------------------------------------------------------------------------------------------------------------------------------------------------------------------------------------------------------------------------------------------------------------------------------------------------------------------------------------------------------------------------------------------------------------------------------------------------------------------------------------------------------------------------------------------------------------------------------------------------------|
| Developed | Developed, Developed/High Intensity, Developed/Low Intensity, Developed/Medium Intensity, Developed/Open Space                                                                                                                                                                                                                                                                                                                                                                                                                                                                                                                                                                                                                                                                                                                                                                                                                                                                                                                                                                                                                                                                                                                                                                                                                                                                                                                             |
| Forest    | Deciduous Forest, Evergreen Forest, Mixed Forest, Forest                                                                                                                                                                                                                                                                                                                                                                                                                                                                                                                                                                                                                                                                                                                                                                                                                                                                                                                                                                                                                                                                                                                                                                                                                                                                                                                                                                                   |
| Pasture   | Grassland/Pasture, Pasture/Grass                                                                                                                                                                                                                                                                                                                                                                                                                                                                                                                                                                                                                                                                                                                                                                                                                                                                                                                                                                                                                                                                                                                                                                                                                                                                                                                                                                                                           |
| Rangeland | Nonag/Undefined, Shrubland, Sod/Grass Seed, Herbs                                                                                                                                                                                                                                                                                                                                                                                                                                                                                                                                                                                                                                                                                                                                                                                                                                                                                                                                                                                                                                                                                                                                                                                                                                                                                                                                                                                          |
| Crop      | Alfalfa, Almonds, Apples, Apricots, Aquaculture, Asparagus, Barley, Barren, Blueberries, Broccoli, Buckwheat, Cabbage, Camelina, Caneberries, Canola, Cantaloupes, Carrots, Cauliflower, Celery, Cherries, Chick Peas, Christmas Trees, Citrus, Clover/Wildflowers, Corn, Cotton, Cranberries, Cucumbers, Dbl Crop Barley/Corn, Dbl Crop Barley/Sorghum, Dbl Crop Barley/Soybeans, Dbl Crop Corn/Soybeans, Dbl Crop Durum Wht/Sorghum, Dbl Crop Lettuce/Barley, Dbl Crop Lettuce/Cantaloupe, Dbl Crop Lettuce/Cotton, Dbl Crop Lettuce/Durum Wht, Dbl Crop Oats/Corn, Dbl Crop Soybeans/Cotton, Dbl Crop Soybeans/Oats, Dbl Crop WinWht/Corn, Dbl Crop WinWht/Cotton, Dbl Crop WinWht/Sorghum, Dbl Crop WinWht/Soybeans, Dry Beans, Durum Wheat, Eggplants, Fallow/Idle Cropland, Flaxseed, Garlic, Gourds, Grapes, Greens, Honeydew Melons, Hops, Lentils, Lettuce, Millet, Mint, Misc Veggies & Fruits, Mustard, Nectarines, Oats,Olives, Onions, Oranges, Other Crops, Other Hay/Non Alfalfa, Other Small Grains, Other Tree Crops, Peaches, Peanuts, Pears, Peas, Pecans, Peppers, Pistachios, Plums, Pomegranates, Pop or Orn Corn, Potatoes, Prunes, Pumpkins, Radishes, Rape Seed, Rice, Rye, Safflower, Sorghum, Soybeans, Speltz, Spring Wheat, Squash, Strawberries, Sugarbeets, Sugarcane, Sunflower, Sweet Corn, Sweet Potatoes, Switchgrass, Tobacco, Tomatoes, Triticale, Turnips, Vetch, Walnuts, Watermelons, Winter Wheat |
| Water     | Herbaceous Wetlands, Open Water, Perennial Ice/Snow, Water, Wetlands, Woody Wetlands                                                                                                                                                                                                                                                                                                                                                                                                                                                                                                                                                                                                                                                                                                                                                                                                                                                                                                                                                                                                                                                                                                                                                                                                                                                                                                                                                       |

**Table S4:** Explanatory variables included in our linear modeling exercise (excluding the intercept term) for the years 2015-2019. For each variable we provide information regarding its nature before any possible transformation (e.g., percentage, count, continuous or binary), as well a reference to the dataset it refers to (i.e., a table or figure where it is discussed in more detail).

| #  | Variable                  | Type                        | Reference                                                           |
|----|---------------------------|-----------------------------|---------------------------------------------------------------------|
| 1  | Year 2015                 | binary                      | Tables <a href="#">S1</a> , <a href="#">S2</a> , <a href="#">S3</a> |
| 2  | Year 2016                 | binary                      | Tables <a href="#">S1</a> , <a href="#">S2</a> , <a href="#">S3</a> |
| 3  | Year 2017                 | binary                      | Tables <a href="#">S1</a> , <a href="#">S2</a> , <a href="#">S3</a> |
| 4  | Year 2018                 | binary                      | Tables <a href="#">S1</a> , <a href="#">S2</a> , <a href="#">S3</a> |
| 5  | Year 2019                 | binary (reference category) | Tables <a href="#">S1</a> , <a href="#">S2</a> , <a href="#">S3</a> |
| 6  | Region Central            | binary (reference category) | Figure <a href="#">S1</a>                                           |
| 7  | Region East North Central | binary                      | Figure <a href="#">S1</a>                                           |
| 8  | Region Northeast          | binary                      | Figure <a href="#">S1</a>                                           |
| 9  | Region Northwest          | binary                      | Figure <a href="#">S1</a>                                           |
| 10 | Region South              | binary                      | Figure <a href="#">S1</a>                                           |
| 11 | Region Southeast          | binary                      | Figure <a href="#">S1</a>                                           |
| 12 | Region Southwest          | binary                      | Figure <a href="#">S1</a>                                           |
| 13 | Region West               | binary                      | Figure <a href="#">S1</a>                                           |
| 14 | Region West North Central | binary                      | Figure <a href="#">S1</a>                                           |
| 15 | Quarter 1                 | binary                      | Tables <a href="#">S1</a> , <a href="#">S2</a>                      |
| 16 | Quarter 2                 | binary                      | Tables <a href="#">S1</a> , <a href="#">S2</a>                      |
| 17 | Quarter 3                 | binary                      | Tables <a href="#">S1</a> , <a href="#">S2</a>                      |
| 18 | Quarter 4                 | binary (reference category) | Tables <a href="#">S1</a> , <a href="#">S2</a>                      |
| 19 | <i>Varroa destructor</i>  | percentage                  | Table <a href="#">S1</a>                                            |
| 20 | Other pests and parasites | percentage                  | Table <a href="#">S1</a>                                            |
| 21 | Diseases                  | percentage                  | Table <a href="#">S1</a>                                            |
| 22 | Pesticides                | percentage                  | Table <a href="#">S1</a>                                            |
| 23 | Other                     | percentage                  | Table <a href="#">S1</a>                                            |
| 24 | Min. temp. std. dev.      | continuous                  | Table <a href="#">S2</a>                                            |
| 25 | Min. temp. norm           | continuous                  | Table <a href="#">S2</a>                                            |
| 26 | Min. temp. entropy        | continuous                  | Table <a href="#">S2</a>                                            |
| 27 | Min. temp. skewness       | continuous                  | Table <a href="#">S2</a>                                            |
| 28 | Min. temp. kurtosis       | continuous                  | Table <a href="#">S2</a>                                            |
| 29 | Min. temp. alpha index    | continuous                  | Table <a href="#">S2</a>                                            |
| 30 | Max. temp. mean           | continuous                  | Table <a href="#">S2</a>                                            |
| 31 | Max. temp. std. dev.      | continuous                  | Table <a href="#">S2</a>                                            |
| 32 | Max. temp. norm           | continuous                  | Table <a href="#">S2</a>                                            |
| 33 | Max. temp. skewness       | continuous                  | Table <a href="#">S2</a>                                            |
| 34 | Max. temp. kurtosis       | continuous                  | Table <a href="#">S2</a>                                            |
| 35 | Precipitation std. dev.   | continuous                  | Table <a href="#">S2</a>                                            |
| 36 | Precipitation norm        | continuous                  | Table <a href="#">S2</a>                                            |
| 37 | Precipitation entropy     | continuous                  | Table <a href="#">S2</a>                                            |
| 38 | Precipitation skewness    | continuous                  | Table <a href="#">S2</a>                                            |
| 39 | Green-area index          | continuous                  | Table <a href="#">S3</a>                                            |



**Table S5:**  $F$ -tests (Hastie and Pregibon, 1992) on the contribution of weather indexes for the years 2015-2019. Comparisons across nested fits for the Gaussian – both with and without the 10% outliers detected by our mixed-integer programming approach (Insolia et al., 2021) – and quasi-Poisson models: sample size ( $n$ ), number of features ( $p$ ), residual degree of freedom and residual deviance (residual sum of squares for the Gaussian models), difference in the degree of freedom between nested models, deviance (sum of squares for the Gaussian case),  $F$ -statistic, and  $p$ -value. For minimum and maximum temperatures, as well as precipitation, the associated reduced models exclude the following weather indexes that we built: "norm", "entropy", "skewness", "kurtosis", and "alpha index".

| Model                  | $n$ | $p$ | Resid. Df | Resid. Dev | Df  | Dev       | $F$  | $\Pr(> F)$  |
|------------------------|-----|-----|-----------|------------|-----|-----------|------|-------------|
| Gaussian               | 674 | 37  | 637       | 168.78     |     |           |      |             |
| (with MIP outliers)    | 674 | 26  | 648       | 174.20     | -11 | -5.42     | 1.86 | 0.0417      |
| Gaussian               | 607 | 37  | 570       | 80.37      |     |           |      |             |
| (without MIP outliers) | 607 | 26  | 581       | 86.79      | -11 | -6.42     | 4.14 | $< 10^{-4}$ |
| Quasi-Poisson          | 674 | 37  | 637       | 618935.58  |     |           |      |             |
| (with MIP outliers)    | 674 | 26  | 648       | 643098.12  | -11 | -24162.54 | 2.17 | 0.0144      |
| Quasi-Poisson          | 674 | 37  | 570       | 348561.16  |     |           |      |             |
| (without MIP outliers) | 674 | 26  | 581       | 371029.26  | -11 | -22468.10 | 3.30 | 0.0002      |

**Table S6:** Spatio-temporal information for outlying cases with unexpectedly higher or lower losses (i.e., large positive or negative residuals, respectively) detected by our mixed-integer programming approach (Insolia et al., 2021) with a 10% trimming for the years 2015-2019. We consider scaled residuals exceeding a given quantile of the standard normal distribution (first column), and for these points we report the number of observations belonging to each climatic region, state, year and quarter.

| Quantile               | Region             | # Obs. | State         | # Obs. | Year | # Obs. | Quarter | # Obs. |
|------------------------|--------------------|--------|---------------|--------|------|--------|---------|--------|
| $> \Phi^{-1}(0.975)$   | South              | 11     | Kansas        | 5      | 2015 | 9      | 1       | 5      |
|                        | West North Central | 9      | Nebraska      | 4      | 2016 | 7      | 2       | 6      |
|                        | Central            | 5      | Arkansas      | 3      | 2017 | 7      | 3       | 16     |
|                        | Northeast          | 5      | Massachusetts | 3      | 2018 | 8      | 4       | 8      |
|                        | Northwest          | 3      | South Dakota  | 3      | 2019 | 4      |         |        |
|                        | Southeast          | 1      | Washington    | 3      |      |        |         |        |
|                        | (Other)            | 1      | (Other)       | 14     |      |        |         |        |
| $> \Phi^{-1}(0.999) X$ | South              | 4      | Kansas        | 2      | 2015 | 4      | 1       | 3      |
|                        | Central            | 3      | South Dakota  | 2      | 2016 | 2      | 2       | 2      |
|                        | Northeast          | 3      | Arkansas      | 1      | 2017 | 4      | 3       | 9      |
|                        | West North Central | 3      | Illinois      | 1      | 2018 | 1      | 4       | 0      |
|                        | Northwest          | 1      | Louisiana     | 1      | 2019 | 3      |         |        |
|                        | East North Central | 0      | Maine         | 1      |      |        |         |        |
|                        | (Other)            | 0      | (Other)       | 6      |      |        |         |        |
| $< \Phi^{-1}(0.025)$   | Northeast          | 9      | Vermont       | 4      | 2015 | 9      | 1       | 6      |
|                        | South              | 7      | Oklahoma      | 3      | 2016 | 9      | 2       | 7      |
|                        | Southwest          | 4      | Louisiana     | 2      | 2017 | 5      | 3       | 9      |
|                        | Central            | 3      | New Jersey    | 2      | 2018 | 3      | 4       | 10     |
|                        | Northwest          | 3      | Oregon        | 2      | 2019 | 6      |         |        |
|                        | East North Central | 2      | Utah          | 2      |      |        |         |        |
|                        | (Other)            | 4      | (Other)       | 17     |      |        |         |        |
| $< \Phi^{-1}(0.001)$   | Northeast          | 6      | Oklahoma      | 2      | 2015 | 6      | 1       | 2      |
|                        | South              | 4      | Vermont       | 2      | 2016 | 3      | 2       | 3      |
|                        | Central            | 2      | Arkansas      | 1      | 2017 | 3      | 3       | 6      |
|                        | Southwest          | 2      | Connecticut   | 1      | 2018 | 1      | 4       | 4      |
|                        | Northwest          | 1      | Idaho         | 1      | 2019 | 2      |         |        |
|                        | East North Central | 0      | Kentucky      | 1      |      |        |         |        |
|                        | (Other)            | 0      | (Other)       | 7      |      |        |         |        |

**Table S7:** Regression results for the colony loss response against the sole predictor “other pests and parasites” (Model 1), against the sole predictor *V. destructor* (Model 2), against both “other pests and parasites” and *V. destructor* (Model 3), and finally against these two predictors and “other” (Model 4) for the years 2015-2019. For each predictor in each fit, we report the corresponding coefficient estimate, standard error, *t*-statistic and *p*-value. Outlying cases detected by our mixed-integer programming approach (Insolia et al., 2021) based on a 10% trimming were excluded from the analysis. While the marginal regressions in Models 1-2 have positive coefficients, the coefficient for “other pests and parasites” changes sign in Model 3, and becomes negative and significant after the inclusion of the variable “other” in Model 4.

| Model | Coefficient               | Estimate | Std. Error | <i>t</i> value | Pr(>   <i>t</i>  )     |
|-------|---------------------------|----------|------------|----------------|------------------------|
| 1     | (Intercept)               | -1.9608  | 0.0498     | -39.34         | $< 2 \times 10^{-16}$  |
|       | Other pests and parasites | 0.0564   | 0.0180     | 3.14           | 0.0018                 |
| 2     | (Intercept)               | -1.9348  | 0.0294     | -65.77         | $< 2 \times 10^{-16}$  |
|       | <i>Varroa destructor</i>  | 0.1957   | 0.0229     | 8.54           | $< 2 \times 10^{-16}$  |
| 3     | (Intercept)               | -1.9672  | 0.0475     | -41.43         | $< 2 \times 10^{-16}$  |
|       | Other pests and parasites | -0.0169  | 0.0195     | -0.87          | 0.3853                 |
|       | <i>Varroa destructor</i>  | 0.2064   | 0.0260     | 7.92           | $1.11 \times 10^{-14}$ |
| 4     | (Intercept)               | -1.5086  | 0.0686     | -22.00         | $< 2 \times 10^{-16}$  |
|       | Other pests and parasites | -0.0450  | 0.0186     | -2.42          | 0.0158                 |
|       | <i>Varroa destructor</i>  | 0.1555   | 0.0252     | 6.17           | $1.25 \times 10^{-9}$  |
|       | Other                     | 0.1976   | 0.0224     | 8.82           | $< 2 \times 10^{-16}$  |

**Table S8:** Comparison of estimated regression coefficients' signs across different estimation methods and models (negative/positive signs are reported as red/green cells) for the years 2015-2019. For our linear modeling exercise, as the one used by our mixed-integer programming (MIP) approach (Insolia et al., 2021) in the main text, we consider: *OLS*: ordinary least squares; *glmnet*: elastic-net penalty with mixing parameter  $\alpha = 0.8$  (Simon et al., 2011); *SCAD*: smoothly-clipped absolute deviations penalty (Breheny and Huang, 2011); *sparseLTS*: lasso penalty with least trimmed of squares loss based on a 10% trimming (Alfons, 2021). For the same model using count data as a response variable (i.e., the number of lost colonies per state and quarter) and an additional offset to capture different scales (i.e., the logarithm of maximum number of colonies per state and quarter), we compare: *glmnet-Poisson*: elastic-net penalty for Poisson models with mixing parameter  $\alpha = 0.8$  (Simon et al., 2011); *snet-NB*: SCAD penalty with a ridge-like parameter (also here we set  $\alpha = 0.8$ ) for negative binomial models (Breheny and Huang, 2011). Overall, these results are fairly consistent across different methods, and with the ones discussed in the main text for MIP. However, MIP provides a sparser and more interpretable solution.

|  | Coefficient               | OLS | glmnet | SCAD | sparseLTS | glmnet-Poisson | snet-NB |
|--|---------------------------|-----|--------|------|-----------|----------------|---------|
|  | (Intercept)               |     |        |      |           |                |         |
|  | Year 2015                 |     |        |      |           |                |         |
|  | Year 2016                 |     |        |      |           |                |         |
|  | Year 2017                 |     |        |      |           |                |         |
|  | Year 2018                 |     |        |      |           |                |         |
|  | East North Central        |     |        |      |           |                |         |
|  | Northeast                 |     |        |      |           |                |         |
|  | Northwest                 |     |        |      |           |                |         |
|  | South                     |     |        |      |           |                |         |
|  | Southeast                 |     |        |      |           |                |         |
|  | Southwest                 |     |        |      |           |                |         |
|  | West                      |     |        |      |           |                |         |
|  | West North Central        |     |        |      |           |                |         |
|  | Quarter 1                 |     |        |      |           |                |         |
|  | Quarter 2                 |     |        |      |           |                |         |
|  | Quarter 3                 |     |        |      |           |                |         |
|  | <i>Varroa destructor</i>  |     |        |      |           |                |         |
|  | Other pests and parasites |     |        |      |           |                |         |
|  | Diseases                  |     |        |      |           |                |         |
|  | Pesticides                |     |        |      |           |                |         |
|  | Other                     |     |        |      |           |                |         |
|  | Min. temp. std. dev.      |     |        |      |           |                |         |
|  | Min. temp. norm           |     |        |      |           |                |         |
|  | Min. temp. entropy        |     |        |      |           |                |         |
|  | Min. temp. skewness       |     |        |      |           |                |         |
|  | Min. temp. kurtosis       |     |        |      |           |                |         |
|  | Min. temp. alpha index    |     |        |      |           |                |         |
|  | Max. temp. mean           |     |        |      |           |                |         |
|  | Max. temp. std. dev.      |     |        |      |           |                |         |
|  | Max. temp. norm           |     |        |      |           |                |         |
|  | Max. temp. skewness       |     |        |      |           |                |         |
|  | Max. temp. kurtosis       |     |        |      |           |                |         |
|  | Precipitation std. dev.   |     |        |      |           |                |         |
|  | Precipitation norm        |     |        |      |           |                |         |
|  | Precipitation entropy     |     |        |      |           |                |         |
|  | Precipitation skewness    |     |        |      |           |                |         |
|  | Green-area index          |     |        |      |           |                |         |

**Table S9:** Comparison of regression coefficients’ signs (negative/positive signs are reported as red/green cells) across different estimation methods and models as in Table S8 for the years 2015-2019. Here each fit is computed on the set of non-outlying cases detected by our mixed-integer programming (MIP) approach (Insolia et al., 2021) with a 10% trimming. In this setting, results are more consistent across methods and models, and they resemble more closely the ones discusses in the main text based on MIP.

| Coefficient               | OLS   | glmnet | SCAD  | sparseLTS | glmnet-Poisson | snet-NB |
|---------------------------|-------|--------|-------|-----------|----------------|---------|
| (Intercept)               | Green | Green  | Green | Green     | Green          | Green   |
| Year 2015                 | Green | Green  | Green | Green     | Green          | Green   |
| Year 2016                 | Green | Green  | Green | Green     | Green          | Green   |
| Year 2017                 | Green | Green  | Green | Green     | Green          | Green   |
| Year 2018                 | Green | Green  | Green | Green     | Green          | Green   |
| East North Central        | Green | Green  | Green | Green     | Green          | Green   |
| Northeast                 | Green | Green  | Green | Green     | Green          | Green   |
| Northwest                 | Green | Green  | Green | Green     | Green          | Green   |
| South                     | Green | Green  | Green | Green     | Green          | Green   |
| Southeast                 | Green | Green  | Green | Green     | Green          | Green   |
| Southwest                 | Green | Green  | Green | Green     | Green          | Green   |
| West                      | Green | Green  | Green | Green     | Green          | Green   |
| West North Central        | Green | Green  | Green | Green     | Green          | Green   |
| Quarter 1                 | Green | Green  | Green | Green     | Green          | Green   |
| Quarter 2                 | Green | Green  | Green | Green     | Green          | Green   |
| Quarter 3                 | Green | Green  | Green | Green     | Green          | Green   |
| <i>Varroa destructor</i>  | Green | Green  | Green | Green     | Green          | Green   |
| Other pests and parasites | Green | Green  | Green | Green     | Green          | Green   |
| Diseases                  | Green | Green  | Green | Green     | Green          | Green   |
| Pesticides                | Green | Green  | Green | Green     | Green          | Green   |
| Other                     | Green | Green  | Green | Green     | Green          | Green   |
| Min. temp. std. dev.      | Green | Green  | Green | Green     | Green          | Green   |
| Min. temp. norm           | Green | Green  | Green | Green     | Green          | Green   |
| Min. temp. entropy        | Green | Green  | Green | Green     | Green          | Green   |
| Min. temp. skewness       | Green | Green  | Green | Green     | Green          | Green   |
| Min. temp. kurtosis       | Green | Green  | Green | Green     | Green          | Green   |
| Min. temp. alpha index    | Green | Green  | Green | Green     | Green          | Green   |
| Max. temp. mean           | Green | Green  | Green | Green     | Green          | Green   |
| Max. temp. std. dev.      | Green | Green  | Green | Green     | Green          | Green   |
| Max. temp. norm           | Green | Green  | Green | Green     | Green          | Green   |
| Max. temp. skewness       | Green | Green  | Green | Green     | Green          | Green   |
| Max. temp. kurtosis       | Green | Green  | Green | Green     | Green          | Green   |
| Precipitation std. dev.   | Green | Green  | Green | Green     | Green          | Green   |
| Precipitation norm        | Green | Green  | Green | Green     | Green          | Green   |
| Precipitation entropy     | Green | Green  | Green | Green     | Green          | Green   |
| Precipitation skewness    | Green | Green  | Green | Green     | Green          | Green   |
| Green-area index          | Green | Green  | Green | Green     | Green          | Green   |

**Table S10:** Features selected by our mixed-integer programming approach (Inso-  
lia et al., 2021) with a 10% trimming, for the years 2015-2019, using state-level  
controls as opposed to climatic regions. The results are consistent with the ones dis-  
cussed in the main text, with the difference that the “green-area index” switches sign  
and results as non-significant, as it partially accounts for state-level variability (see  
Figure S15). Model with  $R^2 = 0.65$ .

| Coefficient               | Estimate | Std. Error | t value | Pr(>  t )          |
|---------------------------|----------|------------|---------|--------------------|
| (Intercept)               | -1.7738  | 1.2278     | -1.44   | 0.1491             |
| Arizona                   | 0.1094   | 0.6708     | 0.16    | 0.8705             |
| Arkansas                  | -0.1449  | 0.1861     | -0.78   | 0.4366             |
| California                | -0.4107  | 0.1659     | -2.48   | 0.0136             |
| Colorado                  | -0.1148  | 0.5634     | -0.20   | 0.8387             |
| Connecticut               | -0.8277  | 0.7260     | -1.14   | 0.2548             |
| Florida                   | -0.1767  | 0.6687     | -0.26   | 0.7916             |
| Georgia                   | -0.2331  | 0.2654     | -0.88   | 0.3801             |
| Idaho                     | -0.4450  | 0.8212     | -0.54   | 0.5881             |
| Illinois                  | -0.1902  | 0.2538     | -0.75   | 0.4541             |
| Indiana                   | -0.2053  | 0.2186     | -0.94   | 0.3480             |
| Iowa                      | -0.4332  | 0.1438     | -3.01   | 0.0027             |
| Kansas                    | 0.0145   | 0.2774     | 0.05    | 0.9583             |
| Kentucky                  | -0.0120  | 0.1416     | -0.08   | 0.9327             |
| Louisiana                 | -0.7142  | 0.2495     | -2.86   | 0.0044             |
| Maine                     | -0.1318  | 0.4264     | -0.31   | 0.7573             |
| Maryland                  | -0.5815  | 0.5958     | -0.98   | 0.3295             |
| Massachusetts             | -0.6169  | 0.7822     | -0.79   | 0.4307             |
| Michigan                  | -0.3856  | 0.3301     | -1.17   | 0.2432             |
| Minnesota                 | -0.1950  | 0.1465     | -1.33   | 0.1836             |
| Mississippi               | -0.2392  | 0.1645     | -1.45   | 0.1463             |
| Missouri                  | -0.4262  | 0.1529     | -2.79   | 0.0055             |
| Montana                   | -0.6731  | 0.9057     | -0.74   | 0.4577             |
| Nebraska                  | -0.5472  | 0.4478     | -1.22   | 0.2223             |
| New Jersey                | -0.7514  | 1.0338     | -0.73   | 0.4677             |
| New Mexico                | 0.5507   | 1.0350     | 0.53    | 0.5949             |
| New York                  | -0.4051  | 0.2001     | -2.02   | 0.0434             |
| North Carolina            | -0.2622  | 0.3058     | -0.86   | 0.3916             |
| North Dakota              | -0.4851  | 0.3613     | -1.34   | 0.1800             |
| Ohio                      | -0.2840  | 0.3602     | -0.79   | 0.4308             |
| Oklahoma                  | 0.0389   | 0.2360     | 0.16    | 0.8693             |
| Oregon                    | -0.6303  | 0.5853     | -1.08   | 0.2820             |
| Pennsylvania              | -0.2796  | 0.2742     | -1.02   | 0.3082             |
| South Carolina            | -0.2622  | 0.3031     | -0.86   | 0.3875             |
| South Dakota              | -0.6196  | 0.5678     | -1.09   | 0.2757             |
| Tennessee                 | 0.0044   | 0.1884     | 0.02    | 0.9814             |
| Texas                     | -0.3294  | 0.1684     | -1.96   | 0.0509             |
| Utah                      | 0.0866   | 0.8043     | 0.11    | 0.9143             |
| Vermont                   | -0.1514  | 0.2965     | -0.51   | 0.6097             |
| Virginia                  | -0.2159  | 0.1976     | -1.09   | 0.2751             |
| Washington                | -0.5987  | 0.2100     | -2.85   | 0.0045             |
| West Virginia             | -0.1110  | 0.1650     | -0.67   | 0.5012             |
| Wisconsin                 | -0.2413  | 0.1517     | -1.59   | 0.1122             |
| Wyoming                   | -0.1348  | 1.1873     | -0.11   | 0.9096             |
| Year 2016                 | -0.1228  | 0.0485     | -2.53   | 0.0116             |
| Year 2017                 | -0.1347  | 0.0477     | -2.82   | 0.0049             |
| Year 2018                 | -0.1526  | 0.0503     | -3.03   | 0.0025             |
| Year 2019                 | -0.1352  | 0.0568     | -2.38   | 0.0178             |
| Quarter 2                 | -0.7523  | 0.0489     | -15.39  | < 10 <sup>-4</sup> |
| Quarter 3                 | -0.3639  | 0.0756     | -4.82   | < 10 <sup>-4</sup> |
| Quarter 4                 | -0.4088  | 0.0476     | -8.58   | < 10 <sup>-4</sup> |
| <i>Varroa destructor</i>  | 0.1743   | 0.0221     | 7.90    | < 10 <sup>-4</sup> |
| Other pests and parasites | -0.0711  | 0.0169     | -4.20   | < 10 <sup>-4</sup> |
| Pesticides                | 0.0223   | 0.0127     | 1.75    | 0.0802             |
| Other                     | 0.1578   | 0.0181     | 8.71    | < 10 <sup>-4</sup> |
| Min. temp. std. dev.      | 0.0557   | 0.0208     | 2.68    | 0.0076             |
| Min. temp. skewness       | 0.1861   | 0.0497     | 3.74    | 0.0002             |
| Min. temp. kurtosis       | 0.5509   | 0.1196     | 4.60    | < 10 <sup>-4</sup> |
| Min. temp. alpha index    | -0.2016  | 0.0735     | -2.74   | 0.0063             |
| Max. temp. kurtosis       | 0.2344   | 0.1097     | 2.14    | 0.0331             |
| Precipitation entropy     | 0.0710   | 0.0351     | 2.02    | 0.0435             |
| Green-area index          | -0.0645  | 0.4965     | -0.13   | 0.8967             |

**Table S11:** Ordinary least squares fit computed on the sets of non-outlying cases and selected features by our mixed-integer programming (MIP) approach (Insolia et al., 2021) based on a 10% trimming, for the years 2015-2019, with additional lagged variables for stressors and weather indexes. Lags are computed according to data for the previous quarter (if available). The model contains  $p = 25$  predictors (including the intercept term), and after the removal of outliers detected by MIP and missing data the sample size reduces to  $n = 437$ . For each predictor, we report the corresponding coefficient estimate, standard error,  $t$ -statistic and  $p$ -value. The model has an  $R^2 = 0.58$ . The results are consistent with the ones discussed in the main text for MIP, and only a few lagged terms report a significant coefficient; namely: “lagged *V. destructor*”, “lagged skewness of minimum temperatures”, and “lagged kurtosis of minimum temperatures”.

| Coefficient                      | Estimate | Std. Error | $t$ value | $\Pr(>  t )$ |
|----------------------------------|----------|------------|-----------|--------------|
| (Intercept)                      | -3.4644  | 0.4066     | -8.52     | $< 10^{-4}$  |
| Region East North Central        | -0.1574  | 0.0720     | -2.19     | 0.0292       |
| Region Northeast                 | -0.2360  | 0.0702     | -3.36     | 0.0009       |
| Region Northwest                 | -0.6493  | 0.1083     | -5.99     | $< 10^{-4}$  |
| Region South                     | -0.2815  | 0.0828     | -3.40     | 0.0007       |
| Region Southeast                 | 0.0142   | 0.0655     | 0.22      | 0.8290       |
| Region Southwest                 | -0.1416  | 0.1246     | -1.14     | 0.2565       |
| Region West                      | -0.4405  | 0.1270     | -3.47     | 0.0006       |
| Region West North Central        | -0.5165  | 0.1130     | -4.57     | $< 10^{-4}$  |
| Year 2015                        | 0.1750   | 0.0830     | 2.11      | 0.0356       |
| Year 2016                        | 0.0618   | 0.0763     | 0.81      | 0.4183       |
| Year 2017                        | 0.0472   | 0.0743     | 0.64      | 0.5255       |
| Year 2018                        | 0.0141   | 0.0755     | 0.19      | 0.8521       |
| Quarter 1                        | 0.2986   | 0.0903     | 3.31      | 0.0010       |
| Quarter 2                        | -0.3394  | 0.0889     | -3.82     | 0.0002       |
| Quarter 3                        | -0.0040  | 0.1030     | -0.04     | 0.9689       |
| <i>Varroa destructor</i>         | 0.1826   | 0.0257     | 7.11      | $< 10^{-4}$  |
| Other pests and parasites        | -0.0664  | 0.0195     | -3.40     | 0.0007       |
| Pesticides                       | 0.0400   | 0.0150     | 2.67      | 0.0079       |
| Other                            | 0.1278   | 0.0216     | 5.93      | $< 10^{-4}$  |
| Min. temp. std. dev.             | 0.0324   | 0.0231     | 1.40      | 0.1622       |
| Min. temp. skewness              | 0.1887   | 0.0606     | 3.11      | 0.0020       |
| Min. temp. kurtosis              | 0.6139   | 0.1455     | 4.22      | $< 10^{-4}$  |
| Min. temp. alpha index           | -0.2574  | 0.0989     | -2.60     | 0.0096       |
| Max. temp. kurtosis              | 0.2826   | 0.1245     | 2.27      | 0.0238       |
| Precipitation entropy            | 0.0899   | 0.0365     | 2.46      | 0.0143       |
| Green-area index                 | 0.1056   | 0.0463     | 2.28      | 0.0231       |
| Lagged <i>Varroa destructor</i>  | 0.0472   | 0.0261     | 1.81      | 0.0718       |
| Lagged Other pests and parasites | -0.0071  | 0.0196     | -0.36     | 0.7187       |
| Lagged Pesticides                | 0.0001   | 0.0150     | 0.01      | 0.9956       |
| Lagged Other                     | -0.0270  | 0.0219     | -1.23     | 0.2191       |
| Lagged Min. temp. std. dev.      | 0.0349   | 0.0257     | 1.36      | 0.1744       |
| Lagged Min. temp. skewness       | 0.1447   | 0.0624     | 2.32      | 0.0209       |
| Lagged Min. temp. kurtosis       | 0.3927   | 0.1404     | 2.80      | 0.0054       |
| Lagged Min. temp. alpha index    | -0.0527  | 0.0861     | -0.61     | 0.5404       |
| Lagged Max. temp. kurtosis       | 0.1133   | 0.1224     | 0.93      | 0.3550       |
| Lagged Precipitation entropy     | -0.0349  | 0.0356     | -0.98     | 0.3273       |

**Table S12:** Ordinary least squares fit for the features selected by glmnet (Simon et al., 2011) – with mixing parameter  $\alpha = 0.8$  and enforcing the inclusion of features selected by our mixed-integer programming (MIP) approach (Insolia et al., 2021) – for a model as in Table 1 of the main text, covering the years 2015-2019, with 55 additional pairwise interaction terms computed among continuous features only ( $p = 82$ ). Interaction terms with a marginal correlation larger than 0.7 were removed at the outset (as described in the *Data treatment* Section of the Supplementary Information), reducing the number of predictors to  $p = 48$ . Outlying cases detected by our MIP based on a 10% trimming were excluded from the analysis ( $n = 607$ ). The model has an  $R^2 = 0.62$ . Most predictors selected by MIP remain significant, such as “*V. destructor*”, “pesticides”, “kurtosis of maximum temperatures”, “entropy of precipitations”, “green-area index”, etc. The interaction terms with a significant coefficient include the interaction of the “green-area index” with “other”, “standard deviation of minimum temperatures”, “entropy of precipitations”, and “skewness of minimum temperature”, as well as the interaction of the “alpha index of minimum temperatures” with “*V. destructor*” and “standard deviation of minimum temperatures”. Overall, these results are consistent with the ones based on MIP which are discussed in the main text.

| Coefficient                                      | Estimate | Std. Error | <i>t</i> value | Pr(>   <i>t</i>  ) |
|--------------------------------------------------|----------|------------|----------------|--------------------|
| (Intercept)                                      | -4.4525  | 0.4915     | -9.06          | < 10 <sup>-4</sup> |
| Year 2015                                        | 0.1205   | 0.0563     | 2.14           | 0.0329             |
| Year 2016                                        | 0.0199   | 0.0550     | 0.36           | 0.7177             |
| Year 2017                                        | 0.0161   | 0.0540     | 0.30           | 0.7658             |
| Year 2018                                        | -0.0295  | 0.0538     | -0.55          | 0.5837             |
| Region East North Central                        | -0.1733  | 0.0609     | -2.85          | 0.0046             |
| Region Northeast                                 | -0.1210  | 0.0611     | -1.98          | 0.0480             |
| Region Northwest                                 | -0.5910  | 0.0859     | -6.88          | < 10 <sup>-4</sup> |
| Region South                                     | -0.1448  | 0.0641     | -2.26          | 0.0242             |
| Region Southeast                                 | 0.0197   | 0.0569     | 0.35           | 0.7290             |
| Region Southwest                                 | -0.0464  | 0.0943     | -0.49          | 0.6225             |
| Region West                                      | -0.2023  | 0.1088     | -1.86          | 0.0634             |
| Region West North Central                        | -0.5694  | 0.0856     | -6.65          | < 10 <sup>-4</sup> |
| Quarter 1                                        | 0.3942   | 0.0480     | 8.22           | < 10 <sup>-4</sup> |
| Quarter 2                                        | -0.3772  | 0.0532     | -7.10          | < 10 <sup>-4</sup> |
| Quarter 3                                        | 0.0023   | 0.0750     | 0.03           | 0.9758             |
| <i>Varroa destructor</i>                         | 0.2510   | 0.0372     | 6.75           | < 10 <sup>-4</sup> |
| Other pests and parasites                        | -0.1911  | 0.0735     | -2.60          | 0.0096             |
| Pesticides                                       | 0.0303   | 0.0122     | 2.49           | 0.0130             |
| Other                                            | 0.0860   | 0.1003     | 0.86           | 0.3915             |
| Min. temp. std. dev.                             | 0.1822   | 0.0456     | 4.00           | 0.0001             |
| Min. temp. skewness                              | -0.1940  | 0.1506     | -1.29          | 0.1982             |
| Min. temp. kurtosis                              | 0.5573   | 0.1240     | 4.49           | < 10 <sup>-4</sup> |
| Min. temp. alpha index                           | -0.1040  | 0.1081     | -0.96          | 0.3365             |
| Max. temp. kurtosis                              | 0.8358   | 0.2693     | 3.10           | 0.0020             |
| Precipitation entropy                            | 0.2311   | 0.0838     | 2.76           | 0.0060             |
| Green-area index                                 | 0.4456   | 0.1263     | 3.53           | 0.0005             |
| <i>Varroa destructor</i> :Min. temp. skewness    | -0.0392  | 0.0502     | -0.78          | 0.4347             |
| <i>Varroa destructor</i> :Min. temp. alpha index | -0.1002  | 0.0571     | -1.75          | 0.0799             |
| Other pests and parasites:Min. temp. alpha index | 0.0346   | 0.0446     | 0.78           | 0.4381             |
| Other pests and parasites:Max. temp. kurtosis    | 0.0869   | 0.0773     | 1.12           | 0.2616             |
| other:Max. temp. kurtosis                        | 0.1298   | 0.0836     | 1.55           | 0.1211             |
| Other:Green-area index                           | -0.0285  | 0.0171     | -1.67          | 0.0958             |
| Min. temp. std. dev.:Min. temp. alpha index      | -0.0411  | 0.0248     | -1.65          | 0.0988             |
| Min. temp. std. dev.:Green-area index            | -0.0433  | 0.0143     | -3.02          | 0.0026             |
| Min. temp. skewness:Green-area index             | 0.1303   | 0.0546     | 2.39           | 0.0174             |
| Precipitation entropy:Green-area index           | -0.0530  | 0.0285     | -1.86          | 0.0638             |



**Table S13:** Features selected using the mixed-integer programming procedure described in [Insolia et al. \(2021\)](#) for the years 2015-2021, with corresponding coefficient estimates, standard errors,  $t$ -statistics and  $p$ -values computed on a subset encompassing 90% of the observations (745 out of 828 are selected as “non-outlying”, concurrently with the feature selection). Group-constraints are used to ensure that categorical controls for quarter and climatic region, e.g., the three terms representing quarters, are either all selected or all excluded. Moreover, we imposed the control for years to be retained in the model – as this would at least partially mitigate the effects of any anomalies in the last two years on the overall fit (here the reference category is the year 2021). Overall, this extended analysis confirms the main findings from [Table 1](#) of the main text. The model has an  $R^2 = 0.56$ .

| Coefficient               | Estimate | Std. Error | $t$ value | Pr(>   $t$  ) |
|---------------------------|----------|------------|-----------|---------------|
| (Intercept)               | -2.2583  | 0.2173     | -10.39    | $< 10^{-4}$   |
| Year 2015                 | 0.1306   | 0.0596     | 2.19      | 0.0288        |
| Year 2016                 | 0.0234   | 0.0596     | 0.39      | 0.6952        |
| Year 2017                 | 0.0404   | 0.0592     | 0.68      | 0.4949        |
| Year 2018                 | 0.0382   | 0.0589     | 0.65      | 0.5167        |
| Year 2019                 | 0.0022   | 0.0647     | 0.03      | 0.9726        |
| Year 2020                 | -0.0728  | 0.0679     | -1.07     | 0.2841        |
| Region East North Central | -0.2090  | 0.0630     | -3.32     | 0.0010        |
| Region Northeast          | -0.2157  | 0.0585     | -3.69     | 0.0002        |
| Region Northwest          | -0.7430  | 0.0781     | -9.51     | $< 10^{-4}$   |
| Region South              | -0.0870  | 0.0647     | -1.34     | 0.1795        |
| Region Southeast          | 0.1219   | 0.0589     | 2.07      | 0.0391        |
| Region Southwest          | -0.0616  | 0.0918     | -0.67     | 0.5027        |
| Region West               | -0.2881  | 0.1026     | -2.81     | 0.0051        |
| Region West North Central | -0.5780  | 0.0799     | -7.23     | $< 10^{-4}$   |
| Quarter 1                 | 0.2691   | 0.0505     | 5.33      | $< 10^{-4}$   |
| Quarter 2                 | -0.2607  | 0.0704     | -3.71     | 0.0002        |
| Quarter 3                 | 0.0377   | 0.1031     | 0.37      | 0.7147        |
| <i>Varroa destructor</i>  | 0.1711   | 0.0196     | 8.74      | $< 10^{-4}$   |
| Other pests and parasites | -0.0682  | 0.0157     | -4.33     | $< 10^{-4}$   |
| Pesticides                | 0.0258   | 0.0116     | 2.23      | 0.0260        |
| Other                     | 0.1858   | 0.0163     | 11.37     | $< 10^{-4}$   |
| Min. temp. skewness       | 0.1053   | 0.0461     | 2.28      | 0.0227        |
| Min. temp. kurtosis       | 0.4844   | 0.1083     | 4.47      | $< 10^{-4}$   |
| Min. temp. alpha index    | -0.2571  | 0.0620     | -4.15     | $< 10^{-4}$   |
| Max. temp. mean           | -0.0129  | 0.0056     | -2.31     | 0.0212        |
| Max. temp. kurtosis       | 0.1535   | 0.0939     | 1.64      | 0.1024        |
| Precipitation entropy     | 0.0764   | 0.0332     | 2.30      | 0.0215        |
| Precipitation skewness    | 0.0157   | 0.0079     | 1.98      | 0.0477        |
| Green-area index          | 0.1527   | 0.0333     | 4.59      | $< 10^{-4}$   |

## Data

The Supplementary Information includes the dataset that we built covering the years 2015-2021 in the [bee\\_data.csv](#) file.

## Source code

The Supplementary Information includes the source code to reproduce our analyses in the [code.zip](#) file.

## References

- Alfons, A. 2021. robustHD: An R package for robust regression with high-dimensional data. *Journal of Open Source Software* 6(67): 3786. <https://doi.org/10.21105/joss.03786> .
- Alfons, A., C. Croux, and S. Gelper. 2013. Sparse least trimmed squares regression for analyzing high-dimensional large data sets. *The Annals of Applied Statistics* 7(1): 226–248. <https://doi.org/10.1214/12-AOAS575> .
- Boryan, C., Z. Yang, R. Mueller, and M. Craig. 2011. Monitoring US agriculture: The US Department of Agriculture, National Agricultural Statistics Service, Cropland Data Layer Program. *Geocarto International* 26(5): 341–358. <https://doi.org/10.1080/10106049.2011.562309> .
- Breheny, P. and J. Huang. 2011. Coordinate descent algorithms for nonconvex penalized regression, with applications to biological feature selection. *Annals of Applied Statistics* 5(1): 232–253. <https://doi.org/10.1214/10-AOAS388> .
- Breiman, L. 2001. Random forests. *Machine Learning* 45(1): 5–32. <https://doi.org/10.1023/A:1010933404324> .
- Hastie, T.J. and D. Pregibon. 1992. Generalized linear models, In *Statistical models in S*, eds. Chambers, J.M. and T.J. Hastie, 195–247. Routledge.
- Insolia, L., A. Kenney, F. Chiaromonte, and G. Felici. 2021. Simultaneous feature selection and outlier detection with optimality guarantees. *Biometrics* in-press. <https://doi.org/10.1111/biom.13553> .
- Karl, T. and W. Koss. 1984. *Regional and National Monthly, Seasonal, and Annual Temperature Weighted by Area, 1895-1983*. Historical climatology series. National Climatic Data Center.
- Kuhn, M. 2009. Building predictive models in r using the caret package. *Journal of Statistical Software* 28(5): 1–26. <https://doi.org/10.18637/jss.v028.i05> .

- Naug, D. 2009. Nutritional stress due to habitat loss may explain recent honeybee colony collapses. *Biological Conservation* 142(10): 2369–2372. <https://doi.org/10.1016/j.biocon.2009.04.007> .
- PRISM Climate Group. 2022. Oregon State University. <http://www.prism.oregonstate.edu> (accessed in August, 2022).
- R Core Team 2021. *R: A Language and Environment for Statistical Computing*. Vienna, Austria: R Foundation for Statistical Computing. <https://www.R-project.org>.
- Redlands, C.E.S.R.I. 2021. ArcGIS Pro: Release 2.8.3. <https://www.esri.com/en-us/arcgis/products/arcgis-pro/resources>.
- Riani, M., A.C. Atkinson, A. Corbellini, A. Farcomeni, and F. Laurini. 2022. Information criteria for outlier detection avoiding arbitrary significance levels. *Econometrics and Statistics* in-press. <https://doi.org/10.1016/j.ecosta.2022.02.002> .
- Rousseeuw, P.J. and K.V. Driessen. 1999. A fast algorithm for the minimum covariance determinant estimator. *Technometrics* 41(3): 212–223. <https://doi.org/10.1080/00401706.1999.10485670> .
- Simon, N., J. Friedman, T. Hastie, and R. Tibshirani. 2011. Regularization paths for cox’s proportional hazards model via coordinate descent. *Journal of Statistical Software* 39(5): 1–13. <https://doi.org/10.18637/jss.v039.i05> .
- Todorov, V. and P. Filzmoser. 2009. An object-oriented framework for robust multivariate analysis. *Journal of Statistical Software* 32(3): 1–47. <https://doi.org/10.18637/jss.v032.i03> .
- United States Department of Agriculture, National Agricultural Statistics Service. 2022. Honey bee colonies. <https://usda.library.cornell.edu/concern/publications/rn301137d> (accessed in August, 2022).
- Wright, M.N., T. Dankowski, and A. Ziegler. 2017. Unbiased split variable selection for random survival forests using maximally selected rank statistics. *Statistics in Medicine* 36(8): 1272–1284. <https://doi.org/10.1002/sim.7212> .
- Wright, M.N. and A. Ziegler. 2017. ranger: A fast implementation of random forests for high dimensional data in C++ and R. *Journal of Statistical Software* 77(1): 1–17. <https://doi.org/10.18637/jss.v077.i01> .
